# Supplementary material for: Coupling photocatalytic CO2 reduction and CH3OH oxidation for selective dimethoxymethane production
Source: PubMed Central journal article supplement (PMC11258228; doi:10.1038/s41467-024-49927-1), 2024-07-18
Supplement: 41467_2024_49927_MOESM1_ESM.pdf [file 41467_2024_49927_MOESM1_ESM.pdf]

1 **Coupling photocatalytic CO<sub>2</sub> reduction and CH<sub>3</sub>OH oxidation for selective**  
2 **dimethoxymethane production**

3 Yixuan Wang<sup>1,2,3#</sup>, Yang Liu<sup>1,2#</sup>, Lingling Wang<sup>1,2</sup>, Silambarasan Perumal<sup>1,2,3</sup>, Hongdan Wang<sup>1,2</sup>,  
4 Hyun Ko<sup>4</sup>, Chung-Li Dong<sup>5</sup>, Panpan Zhang<sup>6</sup>, Shuaijun Wang<sup>7</sup>, Ta Thi Thuy Nga<sup>5</sup>, Young Dok  
5 Kim<sup>1</sup>, Yujing Ji<sup>1</sup>, Shufang Zhao<sup>1</sup>, Ji-Hee Kim<sup>8</sup>, Dong-Yub Yee<sup>8</sup>, Yosep Hwang<sup>1,2</sup>, Jinqiang  
6 Zhang<sup>9</sup>, Min Gyu Kim<sup>10</sup> & Hyoyoung Lee<sup>1,2,3,4\*</sup>

7 <sup>1</sup>Department of Chemistry, Sungkyunkwan University, 2066 Seobu-Ro, Suwon, 16419, Republic  
8 of Korea

9 <sup>2</sup>Creative Research Institute, Sungkyunkwan University, 2066 Seobu-Ro, Suwon, 16419,  
10 Republic of Korea

11 <sup>3</sup>CO<sub>2</sub> to Multicarbon Production Center, Sungkyunkwan University, 2066 Seobu-Ro, Suwon,  
12 16419, Republic of Korea

13 <sup>4</sup>Institute of Quantum Biophysics, Sungkyunkwan University, 2066 Seobu-Ro, Suwon, 16419,  
14 Republic of Korea

15 <sup>5</sup>Department of Physics, Tamkang University, New Taipei City, 25137, Taiwan

16 <sup>6</sup>School of Material Science and Engineering, Jiangsu University, Zhenjiang 212013, People's  
17 Republic of China

18 <sup>7</sup>School of Energy and Power Engineering, Jiangsu University, Zhenjiang 212013, People's  
19 Republic of China

20 <sup>8</sup>Department of Energy Science, Sungkyunkwan University, 2066 Seobu-Ro, Suwon, 16419,  
21 Republic of Korea

22 <sup>9</sup>School of Chemical Engineering, The University of Adelaide, Adelaide, SA, 5005, Australia

23 <sup>10</sup>Beamline Research Division, Pohang Accelerator Laboratory, Pohang University of Science  
24 and Technology, Pohang, 37673, Republic of Korea

25 # These authors contributed equally: Yixuan Wang, Yang Liu

26 \*e-mail: [hyoyoung@skku.edu](mailto:hyoyoung@skku.edu)

27

## 28 **Material Characterizations**

29 The samples' morphology was investigated using a JSM 7401F (JEOL Ltd., Tokyo, Japan)  
30 scanning electron microscope (SEM) operated at 3.0 kV. High-resolution TEM (HRTEM)  
31 images and High-angle annular dark-field scanning transmission electron microscopy (HAADF-  
32 STEM) and EDS elemental mapping images were collected on a JEOL ARM-200F field-  
33 emission transmission electron microscope operating at a 200 kV accelerating voltage. X-ray  
34 photoelectron spectroscopy (XPS), which is located at the chiral material core facility center of  
35 Sungkyunkwan University, was performed using a VG Microtech ESCA 2000 equipped with a  
36 monochromic Al X-ray source (97.9 W, 93.9 eV). X-ray diffraction (XRD) patterns were  
37 acquired using a Rigaku Ultima IV, using the substrates directly. The Inductively Coupled  
38 Plasma Optical Emission Spectroscopy (ICP-OES) was checked by Agilent 5100/PerkinElmer  
39 AVIO 550Max. The In-situ diffuse reflectance infrared Fourier-transform spectra (DRIFTS)  
40 were immediately obtained by an FT-IR spectrometer (Thermo-Fisher Scientific, Nicolet iS10,  
41 USA), which is located at the Chiral Material Core Facility Center of Sungkyunkwan University,  
42 with a reaction system consisting of a praying mantis DRIFTS accessory (Harrick Scientific,  
43 USA) and a reaction cell (HVC, Harrick Scientific, USA). The X-ray absorption spectroscopy  
44 (XAS) measurements were performed at the BL10C beamline of the Pohang Light Source (PLS-  
45 II, Korea). Athena and Artemis software analyzed the acquired XAFS data according to the

46 standard process. The spectra were calibrated, averaged, pre-edge background subtracted, and  
47 post-edge normalized using the Athena program. The Fourier transformation of EXAFS  
48 oscillations from  $k$  to  $R$  space was achieved to obtain a radial distribution function. All data  
49 fitting was completed in the Artemis program. The 300 W Xenon lamp (320-780 nm, PLS-  
50 SXE300, Beijing Perfectlight Technology Co., Ltd) provided the UV-visible light source. The  
51 BET (Brunauer–Emmett–Teller) and HK (Horvath–Kawazoe) methods were used to determine  
52 the specific surface area and micropore analysis, respectively, by using BELSORP-max through  
53 liquid  $N_2$  cryo-sorption (Micrometrics ASAP2020, USA). Photoluminescence (PL) spectra were  
54 obtained using an Agilent Cary Eclipse Fluorescence spectrometer. The UV-Vis-diffuse  
55 reflectance spectra (DRS) were recorded on the Agilent Cary 7000. The electrochemical photo-  
56 current and impedance (EIS) were obtained using an electrochemical workstation (CHI-660E,  
57 USA) with a three-electrode system. For working electrode preparation, 5 mg of catalyst and 20  
58  $\mu\text{L}$  of Nafion solution (5%) were dispersed into a 230  $\mu\text{L}$  mixture solution including DI water  
59 (100  $\mu\text{L}$ ) and IPA (isopropanol, 130  $\mu\text{L}$ ) by sonication for 30 min. 250  $\mu\text{L}$  of suspension was  
60 dropped onto the conductive side of FTO glass with the size of  $1 \times 1 \text{ cm}^2$ . After the sample is  
61 thoroughly dried at room temperature on the FTO glass, the mass loading of all catalysts is  
62 determined as  $5 \text{ mg cm}^{-2}$ . The Ag/AgCl electrode and Pt mesh were used as the reference  
63 electrode, and counter electrode, respectively. The 15 mL 0.1 M  $\text{Na}_2\text{SO}_4$  with 5 mL  $\text{CH}_3\text{OH}$   
64 aqueous solution is the electrolyte. Before the electrochemical test, the  $\text{CO}_2$  gas flowed in the  
65 electrolyte for 30 min then kept the system closed. The productions after the  $\text{CO}_2$  reduction  
66 reaction were detected by the GC system (7890A, Agilent Technologies, USA) with porapak N  
67 and molecular sieve column.  $^{13}\text{C}$  labeling experiments were measured by Gas Chromatograph  
68 Mass Spectrometer (GC-MS) system (YL 6900, YL instrument CO., LTD. Korea) by column–

69 Agilent PoraPLOT Q under temp. 150 °C 35 °C/min. The femtosecond transient absorption  
70 spectroscopy (fs-TA) was measured using a TR spectrometer (Helios, Ultrafast Systems)  
71 operating at a center wavelength of 350 nm with a bandpass filter, one operated by an optical  
72 parametric amplifier (TOPAS Prime, Light Conversion), which was used as the pump beam. The  
73 wavelength of the probe is 370-640 nm, and the pump power is about 200 nJ. The surface  
74 temperatures of the Ag.W-BTO were assessed using an infrared thermal imager (Teledyne FLIR,  
75 FLIR TG165). 25 mg of photocatalyst was positioned at a distance of 40 cm from the 300 W  
76 Xenon lamp cap (wavelength, 320-780 nm).

### 77 **Band gap determination from UV-vis diffuse reflectance spectra**

78 The UV-vis diffuse reflectance spectra were converted to absorption spectra using the  
79 Kubelka-Munk equation (1) first,

$$80 \quad F(R) = \frac{(1 - R)^2}{2R} \quad (1)$$

81 where  $F(R)$  and  $R$  represent the absorption coefficient and the relative reflectance of samples  
82 with infinite thickness in comparison to the reference, respectively. Furthermore, the band gaps  
83 of samples were estimated using the Tauc equation (2),

$$84 \quad F(R)hv = A(hv - E_g)^{\frac{n}{2}} \quad (2)$$

85 in which  $h$ ,  $\nu$ ,  $A$ , and  $E_g$  represent the Planck constant, light frequency, proportionality  
86 constant, and optical band gap, respectively, while  $n$  is determined by the nature of the transition  
87 in a semiconductor. Values of 1, 3, 4, and 6 for  $n$  correspond to the allowed direct, forbidden  
88 direct, allowed indirect, and forbidden indirect transitions, respectively. The values of  $E_g$  were  
89 calculated from the plot of  $(F(R)hv)^{2/n}$  against  $h\nu$  and corresponded to the intercept of the

90 extrapolated linear portion of the plot near the band edge with the  $h\nu$  axis. BTO-related samples  
 91 were treated as semiconductors with allowed indirect transition <sup>1</sup>.

92

93 **Apparent quantum yield (AQY) calculation method**

94 In terms of AQY, the Xe lamp was also replaced by the monochromatic LED light (CEL-  
 95 LEDES35, Beijing Perfectlight Technology Co., Ltd, the wavelengths ( $\lambda$ ) are 395, 420, 500, and  
 96 595 nm, respectively). Other experimental parameters are the same as the photocatalytic DMM  
 97 production process. The light intensity was monitored by an optical power meter  
 98 (CEL-NP2000-2, Beijing Perfectlight Technology Co., Ltd). The number of incident photons ( $N$ )  
 99 is calculated by equation (3), and AQY is then calculated in equation (4).

100

$$101 \quad N = \frac{E\lambda}{hc} = \frac{I \times S \times t \times \lambda}{hc} \quad (3)$$

$$102 \quad \text{AQY} = \frac{\text{the number of reacted electrons}}{\text{the number of incident photons}} \times 100\%$$

$$103 \quad = \frac{[\text{CO}]_n \times 2 + [\text{CH}_4]_n \times 8 + [\text{CH}_2\text{O}]_n \times 4 + [\text{C}_3\text{H}_8\text{O}_2]_n \times 6}{N} \times 100\%$$

$$104 \quad = \frac{2 \times 6.02 \times 10^{23} \times n(\text{CO}) + 8 \times 6.02 \times 10^{23} \times n(\text{CH}_4) + 4 \times 6.02 \times 10^{23} \times n(\text{CH}_2\text{O}) + 6 \times 6.02 \times 10^{23} \times n(\text{C}_3\text{H}_8\text{O}_2)}{N} \times 100\% \quad (4)$$

105

106 In which  $I$  was the light intensity ( $\text{W} \cdot \text{m}^{-2}$ ),  $S$  was the irradiation area ( $\text{m}^2$ ),  $t$  was the DMM  
 107 production time (s),  $\lambda$  was the wavelength of monochromatic LED light (395, 420, 500, and 595  
 108 nm),  $h$  was Planck's constant ( $6.63 \times 10^{-34} \text{ J} \cdot \text{s}$ ), and  $c$  was the speed of light ( $3.8 \times 10^8 \text{ m} \cdot \text{s}^{-1}$ ).  $[\text{CO}]_n$ ,  
 109  $[\text{CH}_4]_n$ ,  $[\text{CH}_2\text{O}]_n$  and  $[\text{C}_3\text{H}_8\text{O}_2]_n$  are the number of evolved CO, CH<sub>4</sub>, CH<sub>2</sub>O and C<sub>3</sub>H<sub>8</sub>O<sub>2</sub>  
 110 molecules, respectively.

111 **DFT calculation method**

112 All calculations were implemented using the Vienna Ab initio Simulation Package (VASP),  
113 based on DFT. We have employed the first principles<sup>2,3</sup> to perform DFT calculations within the  
114 generalized gradient approximation (GGA) using the Perdew-Burke-Ernzerhof (PBE)<sup>4</sup>  
115 formulation. We have chosen the projected augmented wave (PAW) potentials<sup>5,6</sup> to describe the  
116 ionic cores and take valence electrons into account using a plane wave basis set with a kinetic  
117 energy cutoff of 520 eV. The GGA + U method was adopted in our calculations. The value of the  
118 effective Hubbard U was set as 4.814 eV for Ti. Partial occupancies of the Kohn–Sham orbitals  
119 were allowed using the Gaussian smearing method and a width of 0.05 eV. The electronic energy  
120 was considered self-consistent when the energy change was less than  $10^{-5}$  eV. A geometry  
121 optimization was considered convergent when the energy change was smaller than  $0.05 \text{ eV } \text{\AA}^{-1}$ .  
122 In our structure, the U correction is used for Ni atoms. The Brillouin zone integration is  
123 performed using  $2 \times 2 \times 1$  Monkhorst-Pack k-point sampling for a structure. Finally, the adsorption  
124 energies ( $E_{\text{ads}}$ ) were calculated as:

125 
$$E_{\text{ads}} = E_{\text{ad/sub}} - E_{\text{ad}} - E_{\text{sub}} \quad (5)$$

126 where  $E_{\text{ad/sub}}$ ,  $E_{\text{ad}}$ , and  $E_{\text{sub}}$  are the total energies of the optimized adsorbate/substrate system, the  
127 adsorbate in the structure, and the clean substrate, respectively.

128

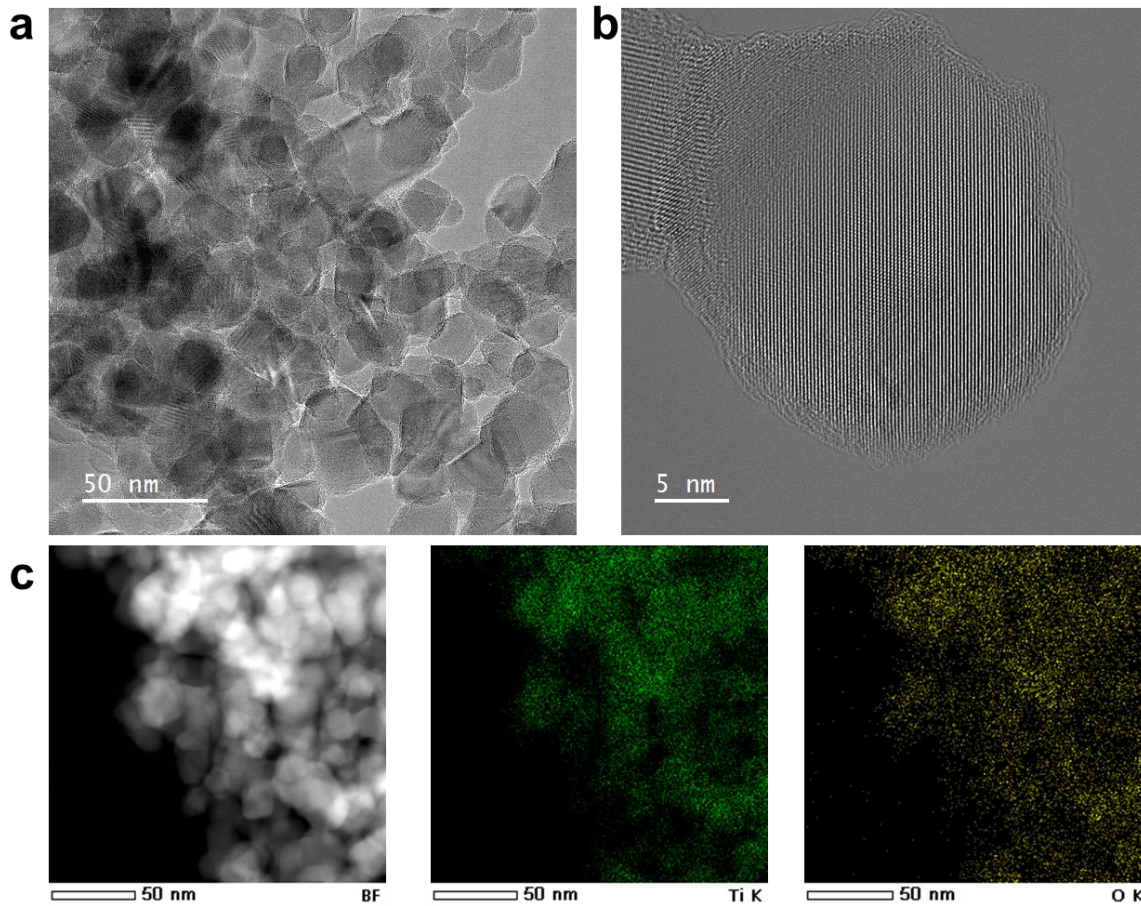

129

130 **Supplementary Figure 1. TEM images of BTO. a TEM, b HR-TEM, and c HAADF-STEM**  
131 **images of BTO and EDS mappings of Ti and O.**

132

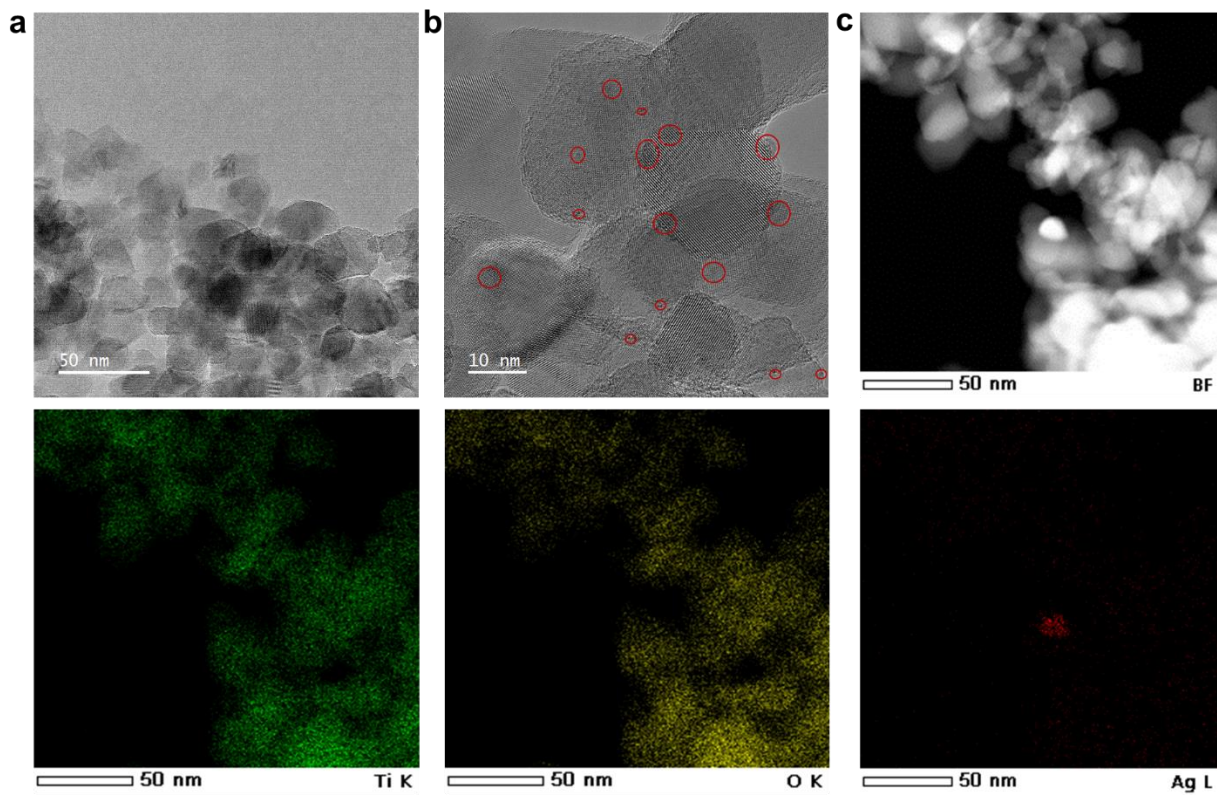

133

134 **Supplementary Figure 2. TEM images of Ag-BTO. a** TEM, **b** HR-TEM, and **c** HAADF-  
 135 STEM images of Ag-BTO and EDS mappings of Ti, O, and Ag.

136



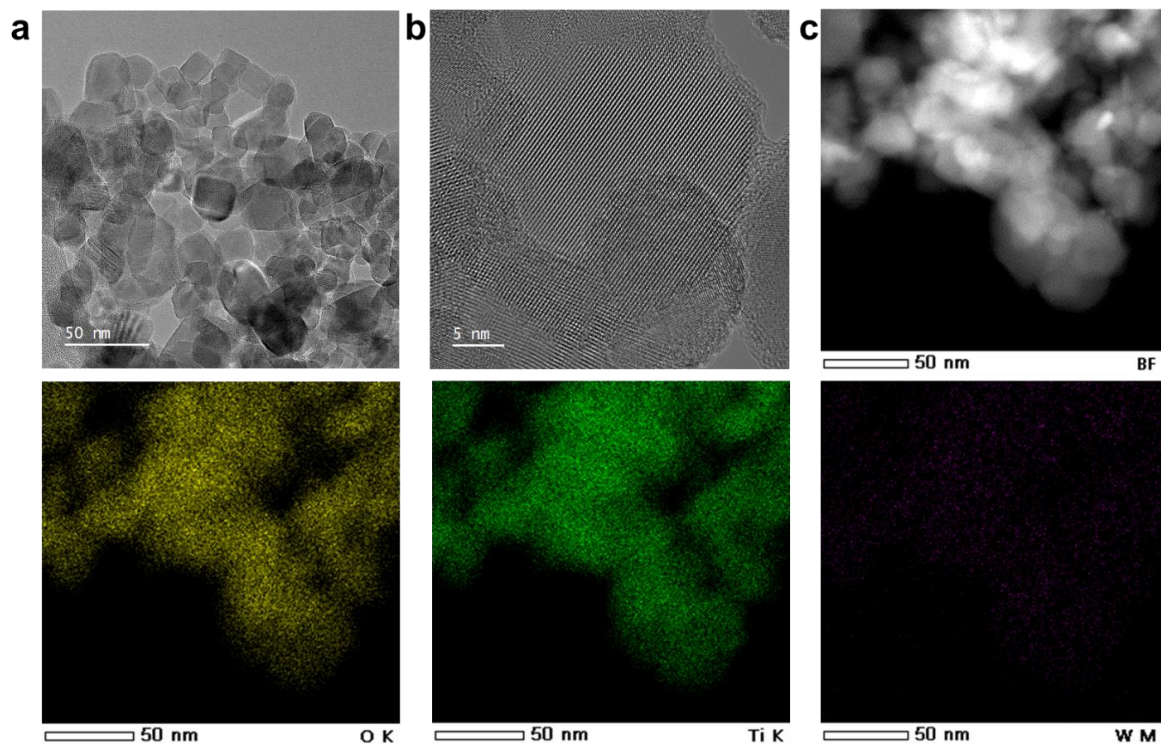

137

138 **Supplementary Figure 3. TEM images of W-BTO. a** TEM, **b** HR-TEM, and **c** HAADF-STEM  
 139 images of W-BTO and EDS mappings of Ti, O, and W.

140

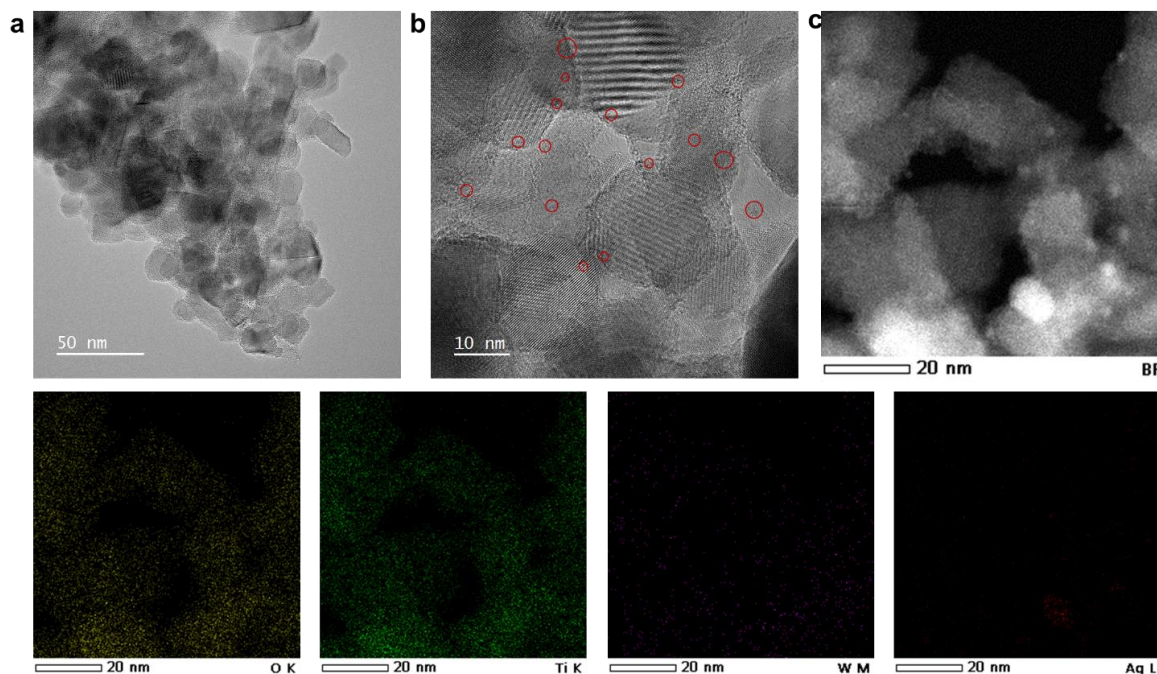

141  
 142 **Supplementary Figure 4. TEM images of Ag.W-BTO-50. a** TEM, **b** HR-TEM, and **c**  
 143 HAADF-STEM images of Ag.W-BTO-50 and EDS mappings of Ti, O, W, and Ag.

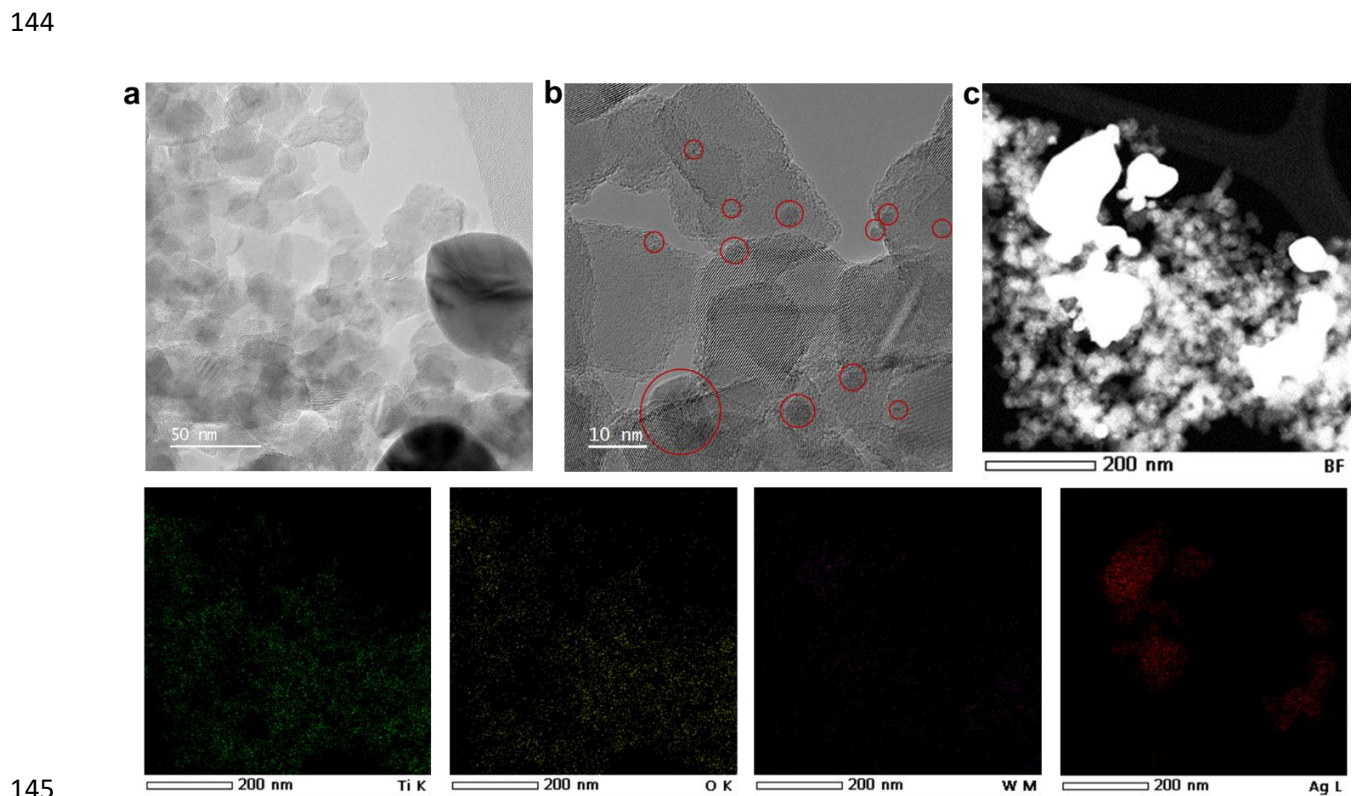

145  
 146 **Supplementary Figure 5. TEM images of Ag.W-BTO-150. a** TEM, **b** HR-TEM, and **c**  
 147 HAADF-STEM images of Ag.W-BTO-150 and EDS mappings of Ti, O, W, and Ag.

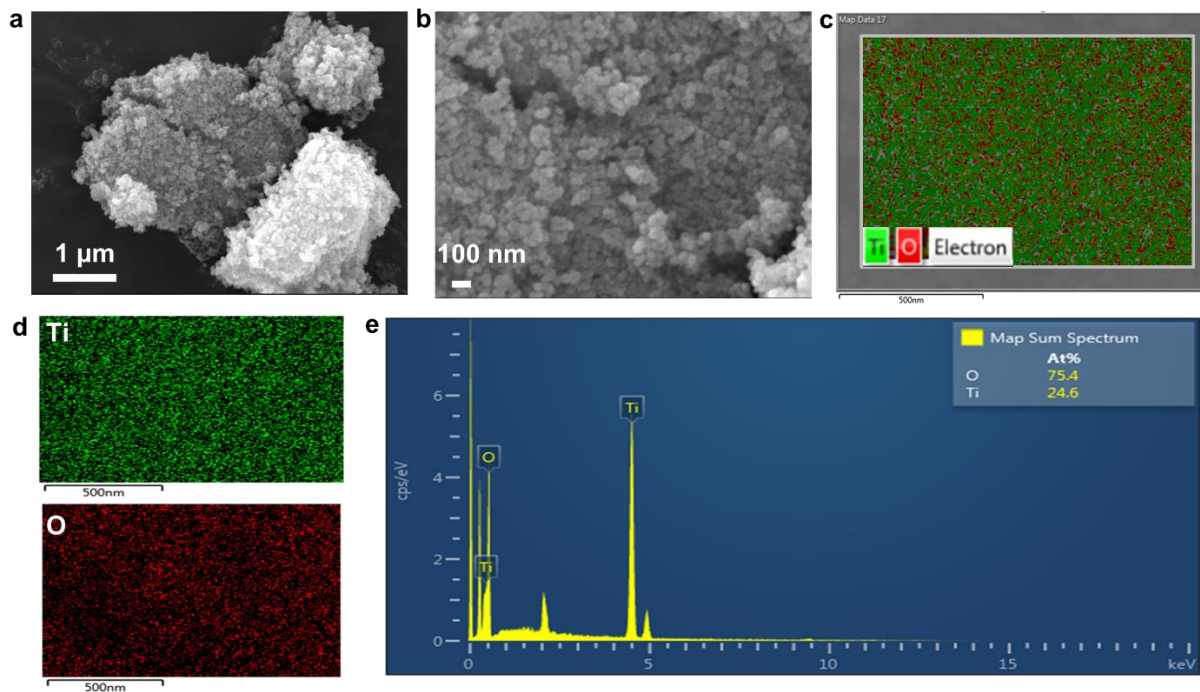

149

150 **Supplementary Figure 6. SEM images of BTO. a, b** SEM images of BTO nano-bulks. **c-e**  
 151 Corresponding elemental mapping of Ti, O, and EDS of the selected area.

152

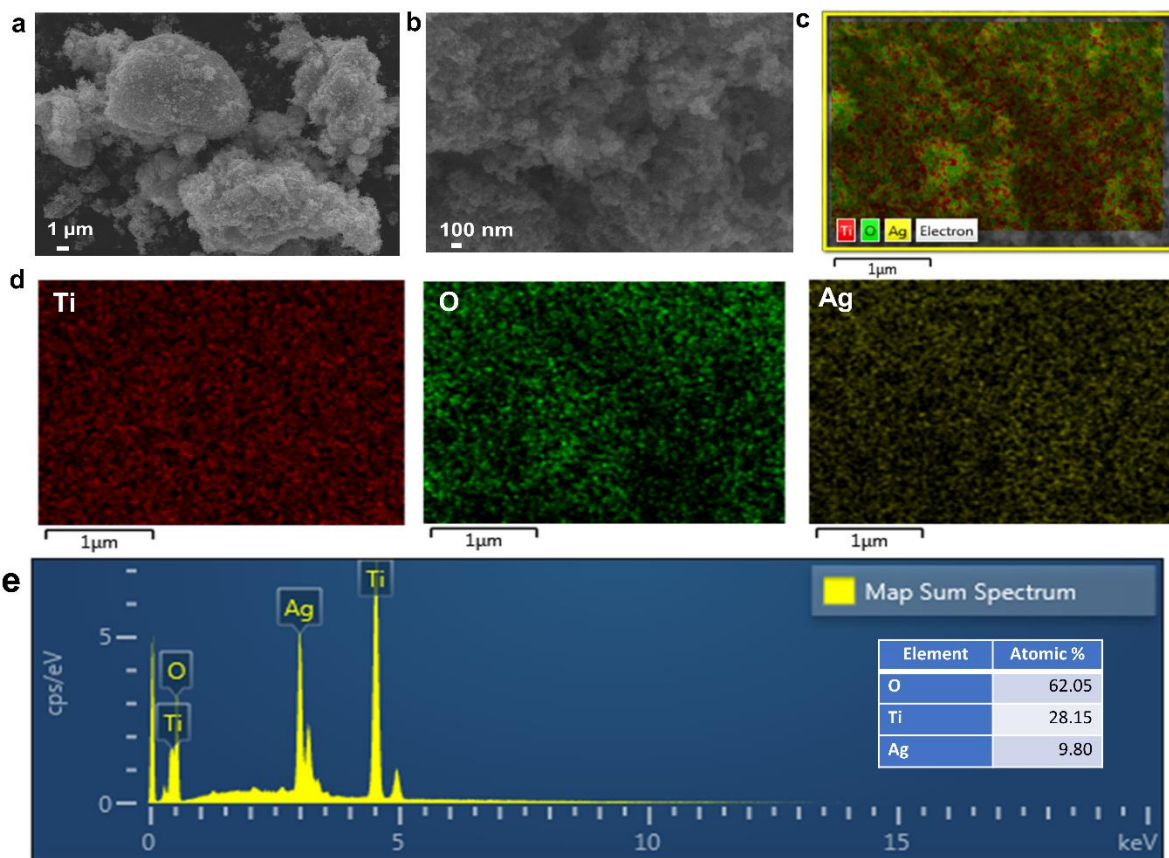

153

154 **Supplementary Figure 7. SEM images of Ag-BTO. a, b** SEM images of Ag-BTO nano-bulks.

155 **c-e** Corresponding elemental mapping of Ag, Ti, O, and EDS of the selected area.

156

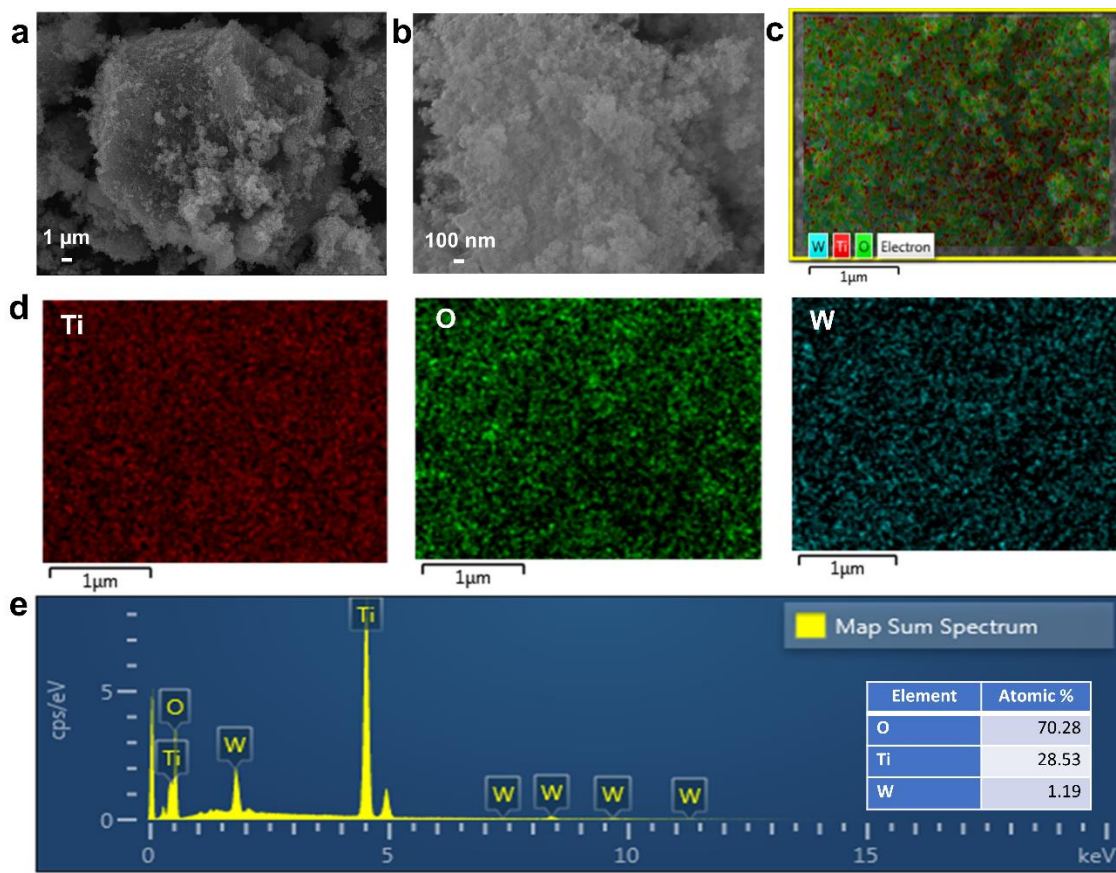

157

158 **Supplementary Figure 8. SEM images of W-BTO. a, b** SEM images of W-BTO nano-bulks.

159 **c-e** Corresponding elemental mapping of W, Ti, O, and EDS of the selected area.

160

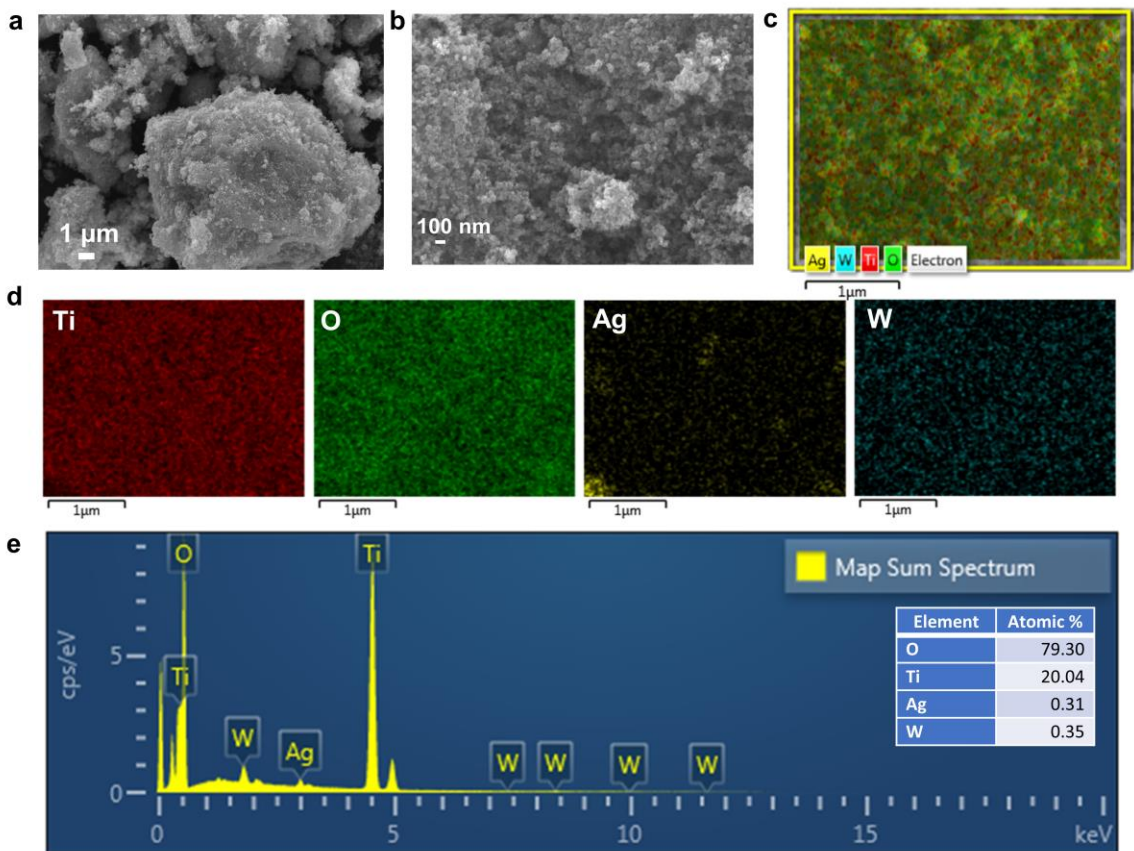

161

162 **Supplementary Figure 9. SEM images of Ag.W-BTO-50. a, b** SEM images of Ag.W-BTO-50  
 163 nano-bulks. **c-e** Corresponding elemental mapping of Ag, W, Ti, O, and EDS of the selected area.

164

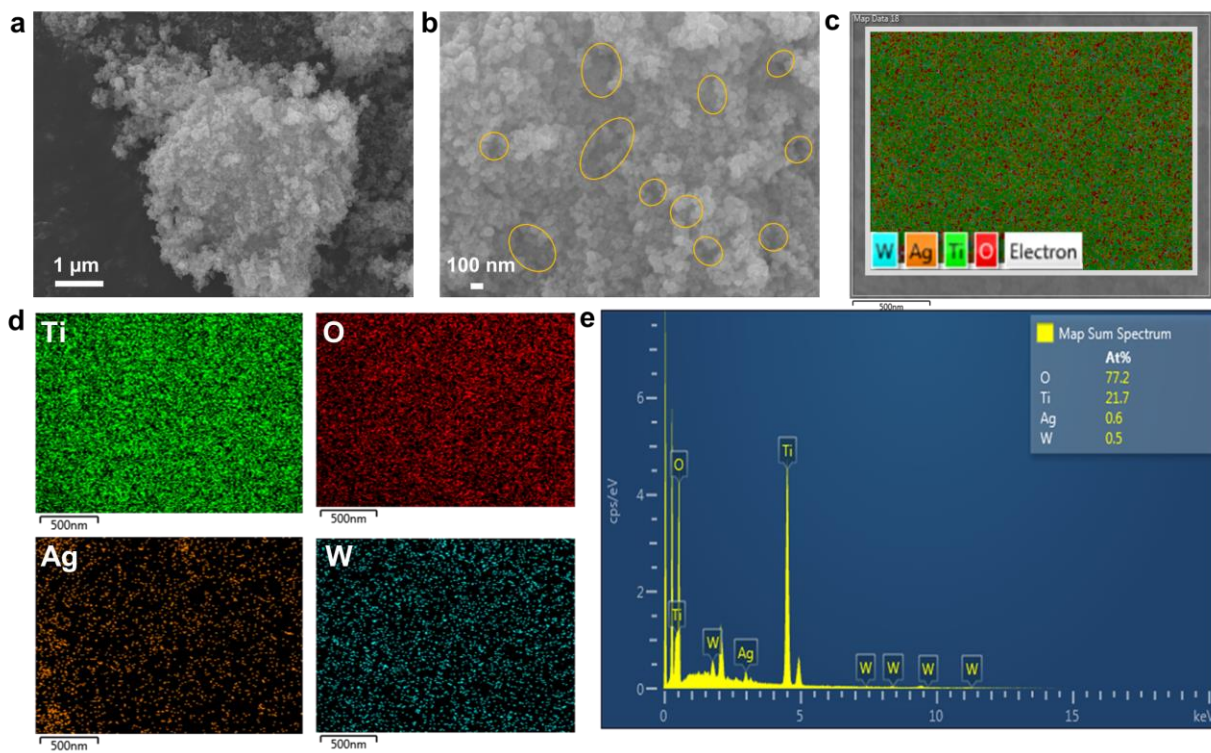

165

166 **Supplementary Figure 10. SEM images of Ag.W-BTO. a, b** SEM images of Ag.W-BTO  
 167 nano-bulks. **c-e** Corresponding elemental mapping of Ti, O, Ag, W, and EDS of the selected area.

168

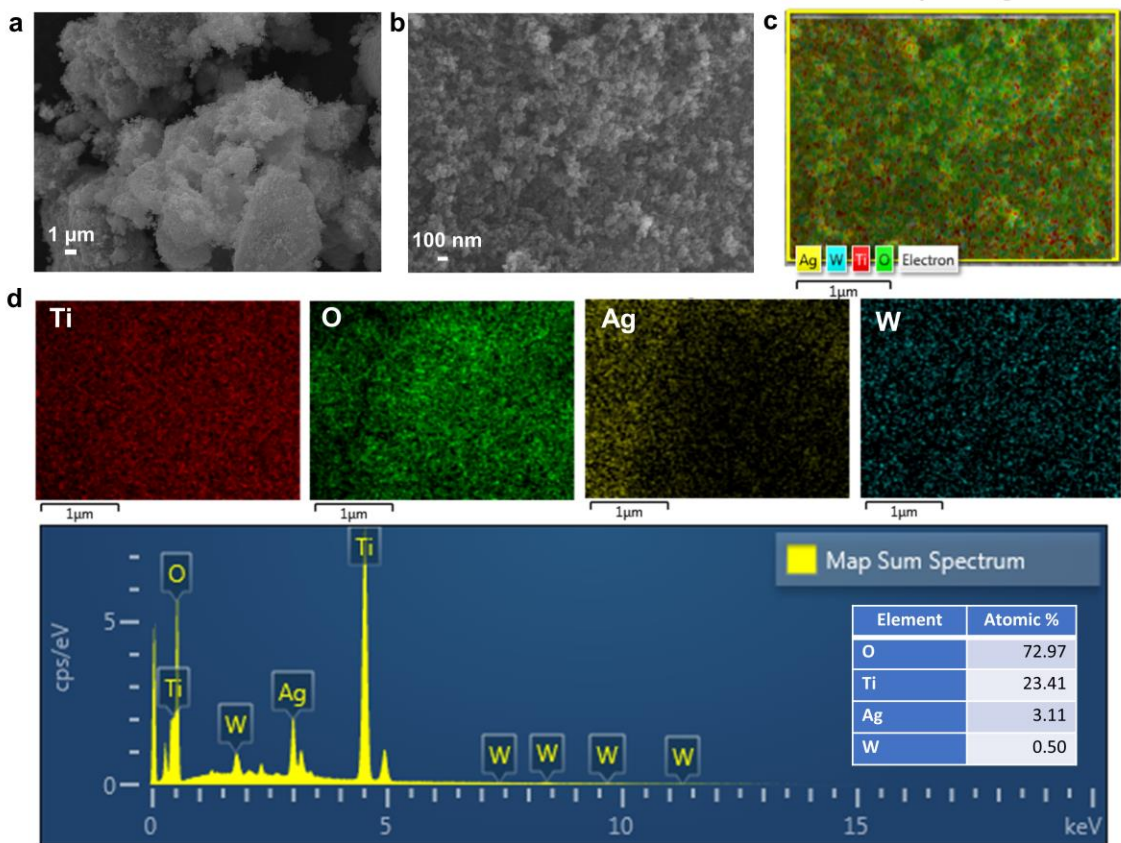

169

170 **Supplementary Figure 11. SEM images of Ag.W-BTO-150. a, b** SEM images of Ag.W-BTO-  
 171 150 nano-bulks. **c-e** Corresponding elemental mapping of Ti, O, Ag, W, and EDS of the selected  
 172 area.

173



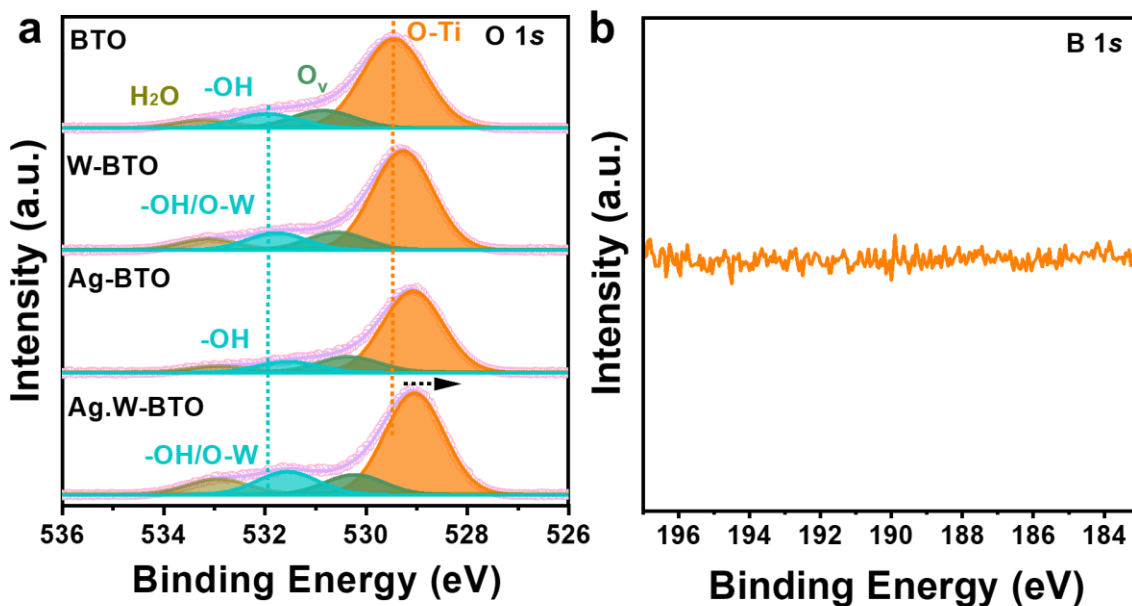

174  
 175 **Supplementary Figure 12.** XPS spectra. **a** O 1s XPS of BTO, W-BTO, Ag-BTO, and Ag.W-  
 176 BTO, respectively. **b** B 1s XPS of Ag.W-BTO.

177

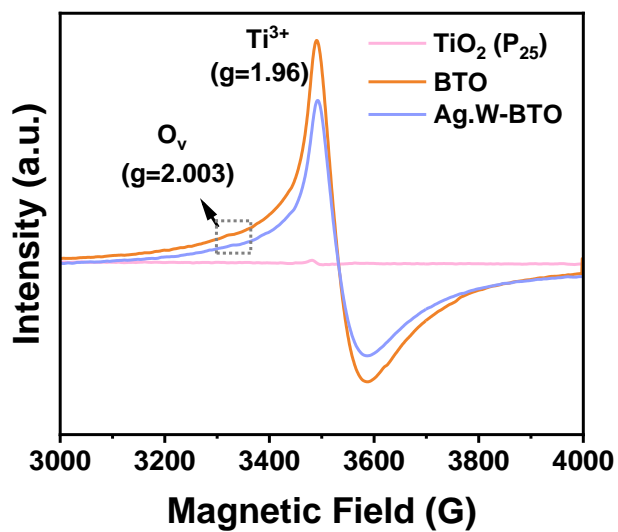

178  
 179 **Supplementary Figure 13.** Electron paramagnetic resonance (EPR) spectra of TiO<sub>2</sub> (P<sub>25</sub>), BTO  
 180 and Ag.W-BTO.

181

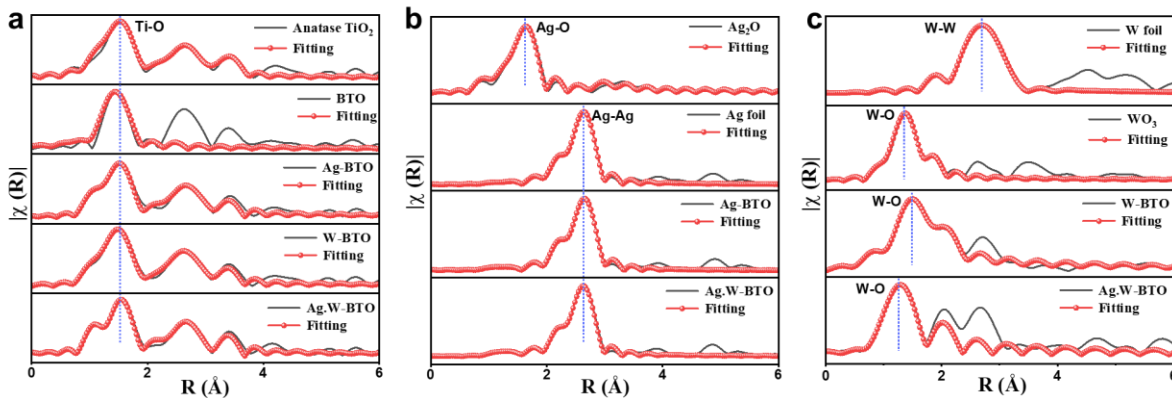

182  
 183 **Supplementary Figure 14. Fitting EXAFS spectrum.** a-c Extended X-ray absorption fine  
 184 structure (EXAFS)  $k^3 \chi(k)$  Fourier-transform (FT) and fitting spectra of Ti, Ag, and W in R-space  
 185 of catalysts with standard references, respectively.  
 186

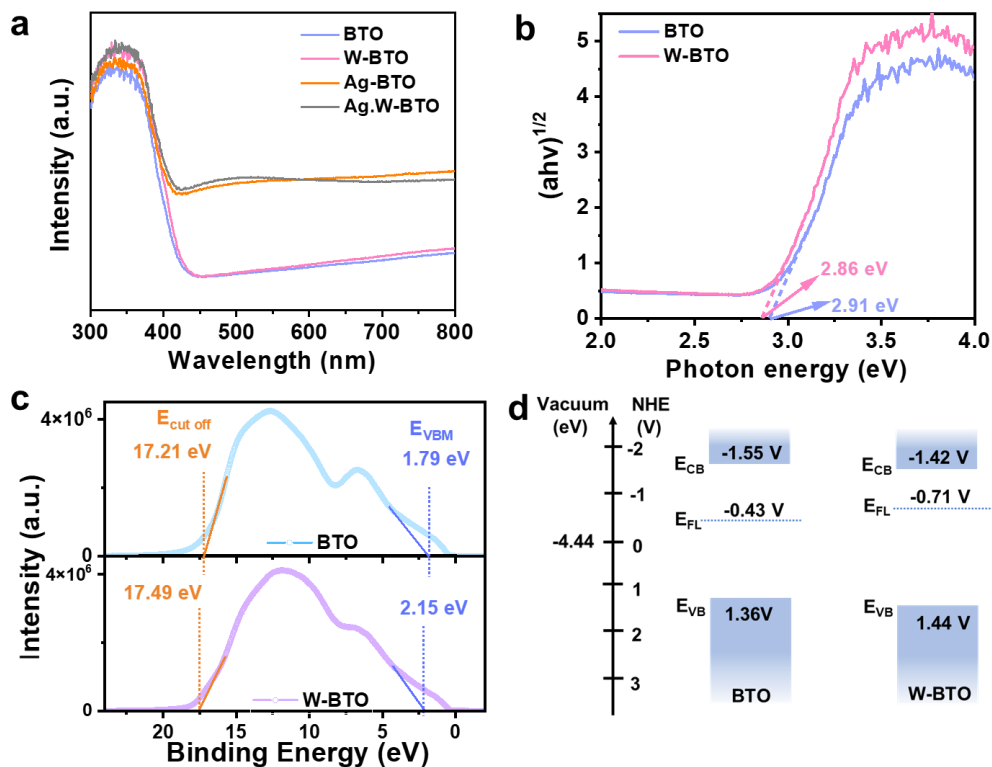

187  
 188 **Supplementary Figure 15. Band gap structures.** a UV-vis of BTO, W-BTO, Ag-BTO, and  
 189 Ag-W-BTO. b estimation of band gap, c UPS and d band gap structure of BTO, W-BTO.

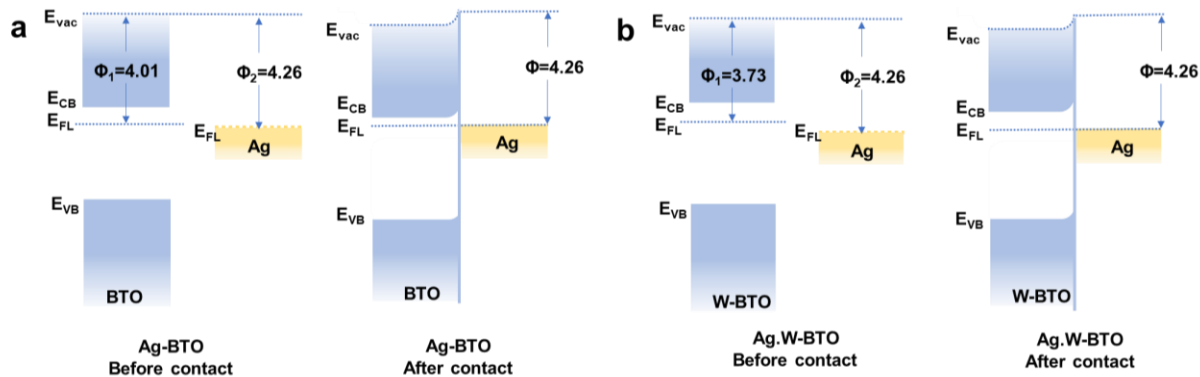

191 **Supplementary Figure 16. Band gap structures. a Ag-BTO and b Ag.W-BTO.**

192

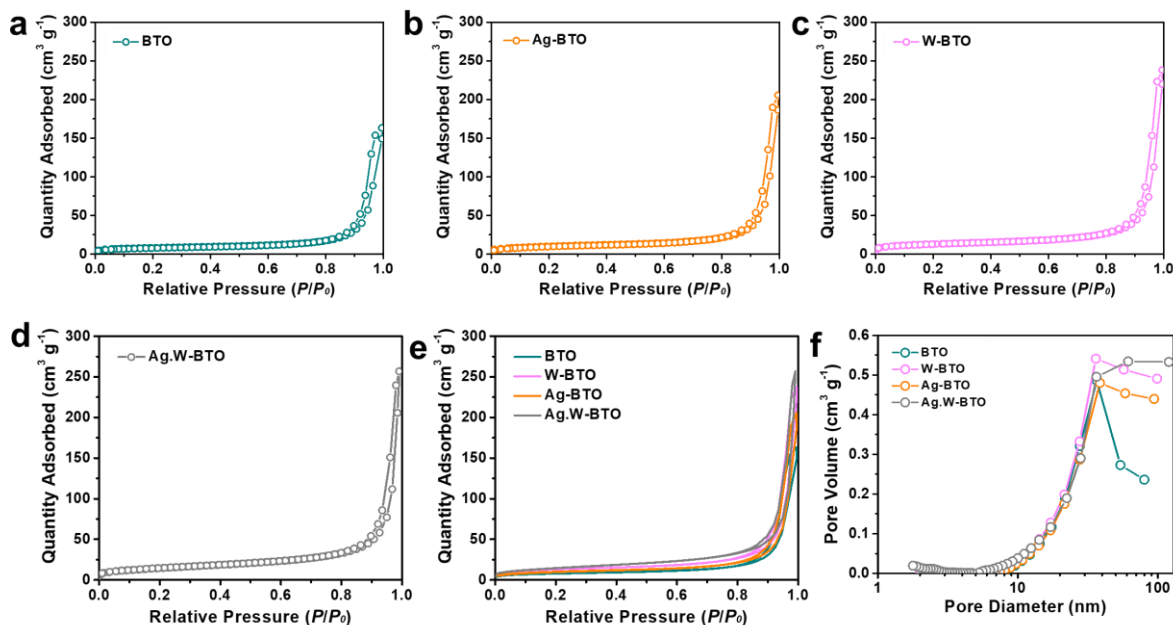

194

194 **Supplementary Figure 17. N<sub>2</sub> sorption isotherms. a BTO, b Ag-BTO, c W-BTO and d Ag.W-**  
 195 **BTO. e Comparison N<sub>2</sub> sorption isotherms and f pore sizes of BTO, W-BTO, Ag-BTO, and**  
 196 **Ag.W-BTO.**

197

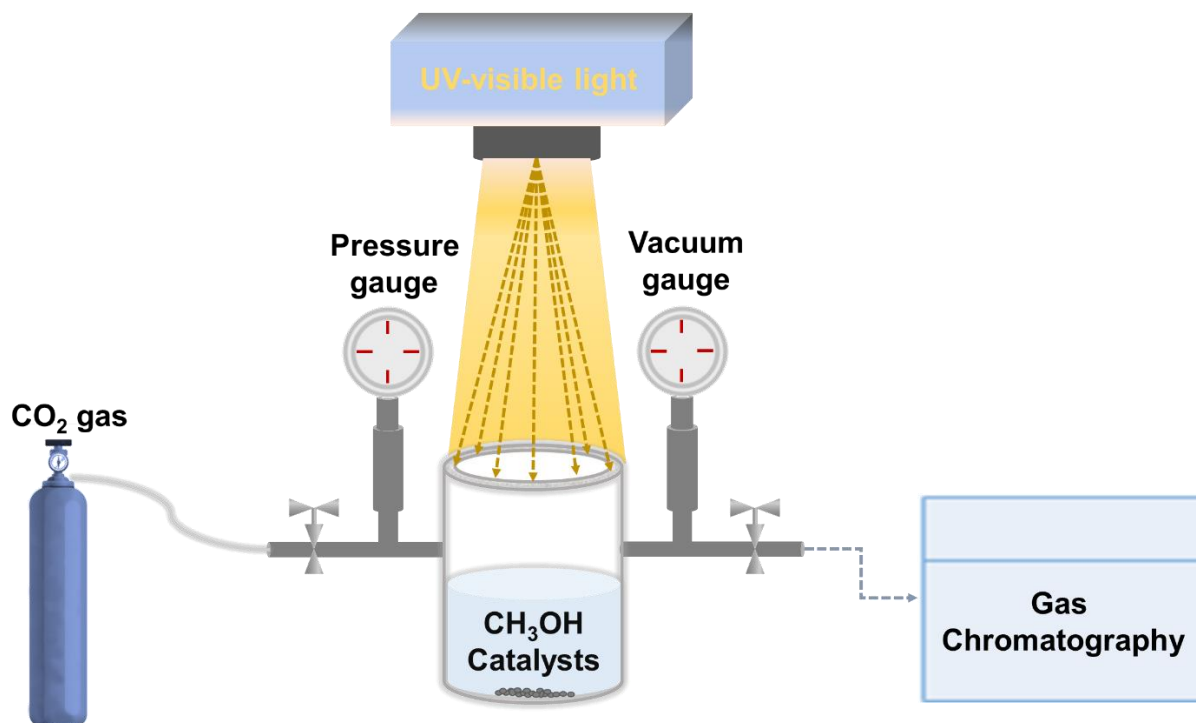

198

199 **Supplementary Figure 18.** Experimental setup used for photocatalytic reaction.

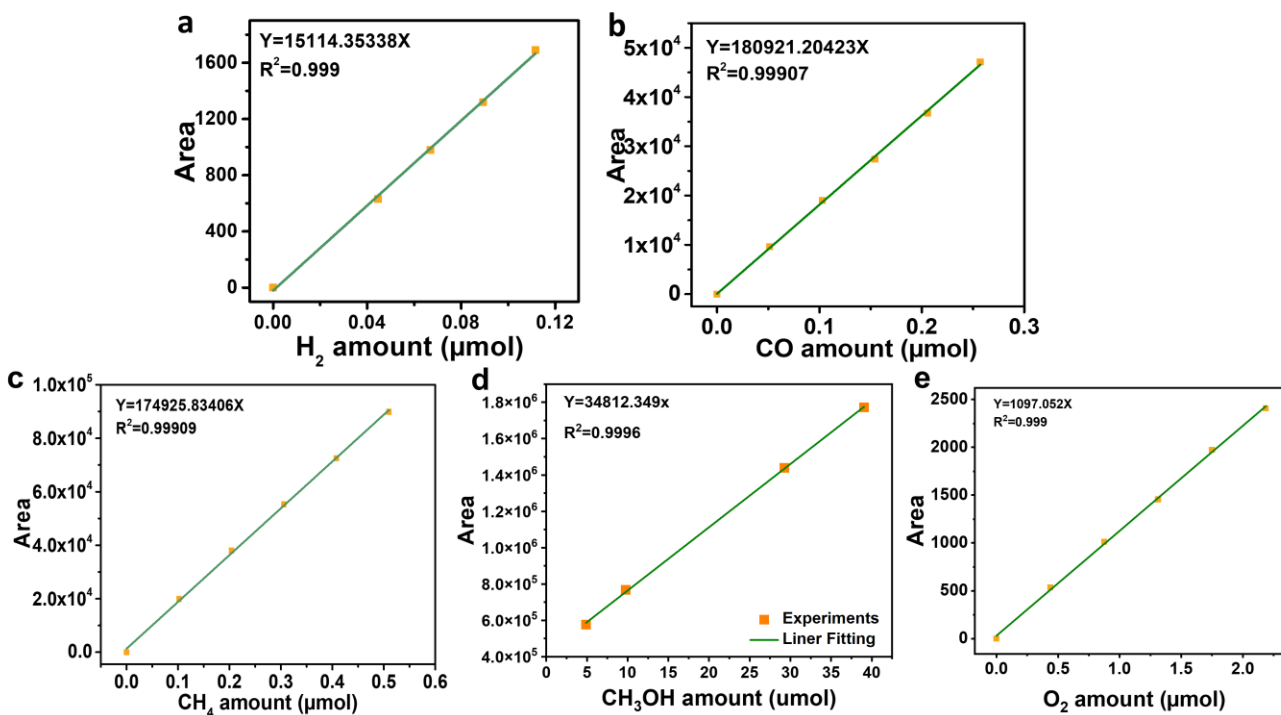

200

201 **Supplementary Figure 19. Calibration curves of GC for the quantification of standard. a**  
 202 **H<sub>2</sub>, b CO, c CH<sub>4</sub>, d CH<sub>3</sub>OH, and e O<sub>2</sub>.**

203

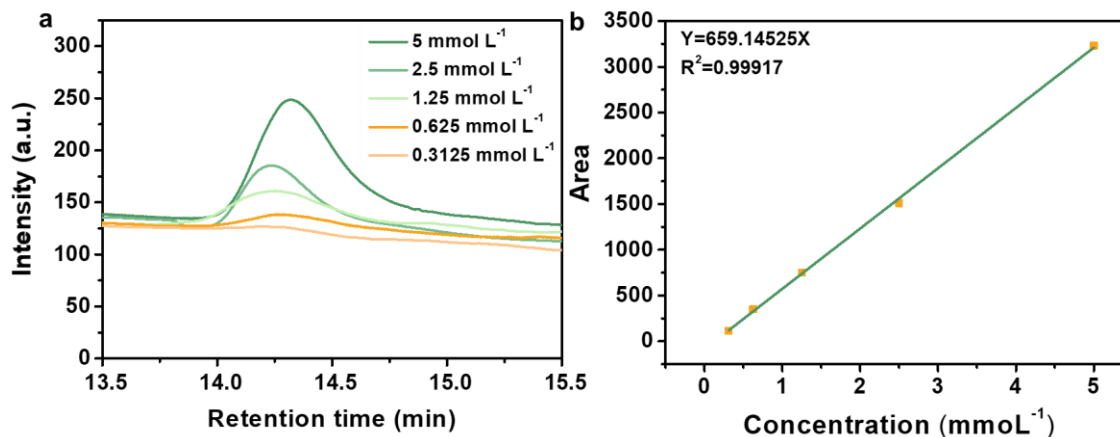

204

205 **Supplementary Figure 20. Calibration curves of CH<sub>2</sub>O. a** GC spectra of the different amounts  
 206 **of CH<sub>2</sub>O standard samples and b calibration curves of GC for the quantification of CH<sub>2</sub>O.**

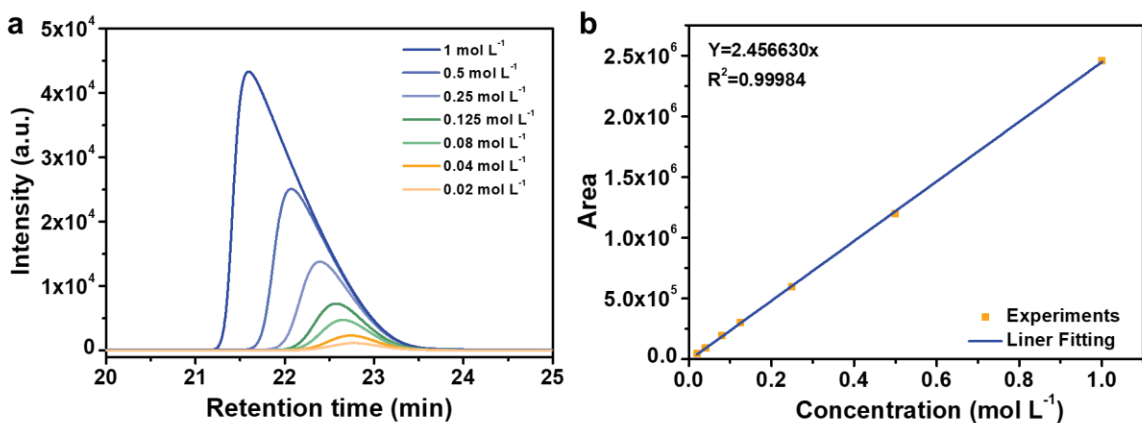

207  
 208 **Supplementary Figure 21. Calibration curves of DMM. a** GC spectrum of DMM standard  
 209 samples and **b** calibration curves of GC for the quantification of DMM.  
 210

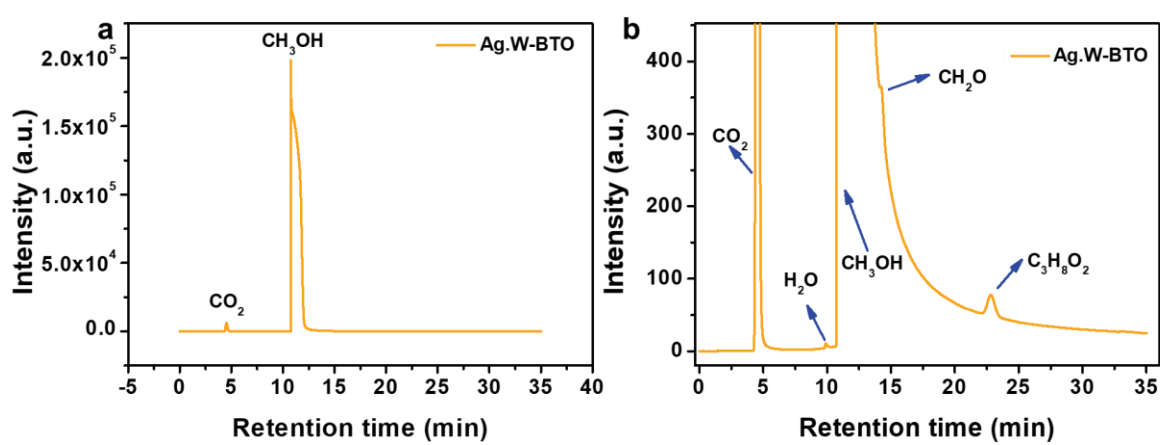

211  
 212 **Supplementary Figure 22. Results of GC spectra. a** Total GC spectra and **b** Enlargement GC  
 213 spectra of Ag.W-BTO from 0 to 35 min of retention time. Enlargement of GC spectra more  
 214 clearly confirms the products after CO<sub>2</sub> reduction on Ag.W-BTO, which shows ultra-high  
 215 selectivity of DMM.

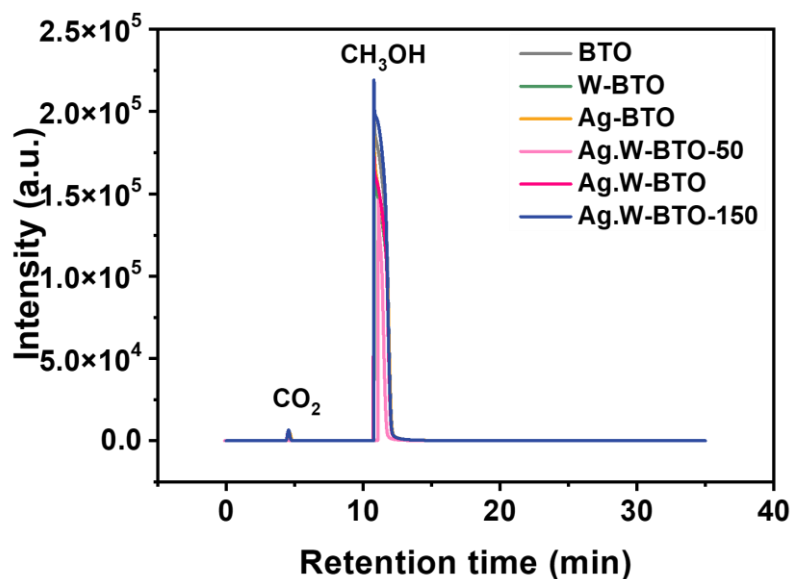

216

217 **Supplementary Figure 23. Results of GC spectra.** Total GC spectrum of all prepared samples  
 218 from 0 to 35 min of retention time. Due to the large amount of CH<sub>3</sub>OH, it is difficult to find the  
 219 peak of production in the same spectra, so the enlarged spectra of production at a specific  
 220 retention time after CO<sub>2</sub> reduction are shown in Supplementary Figure 24.

221

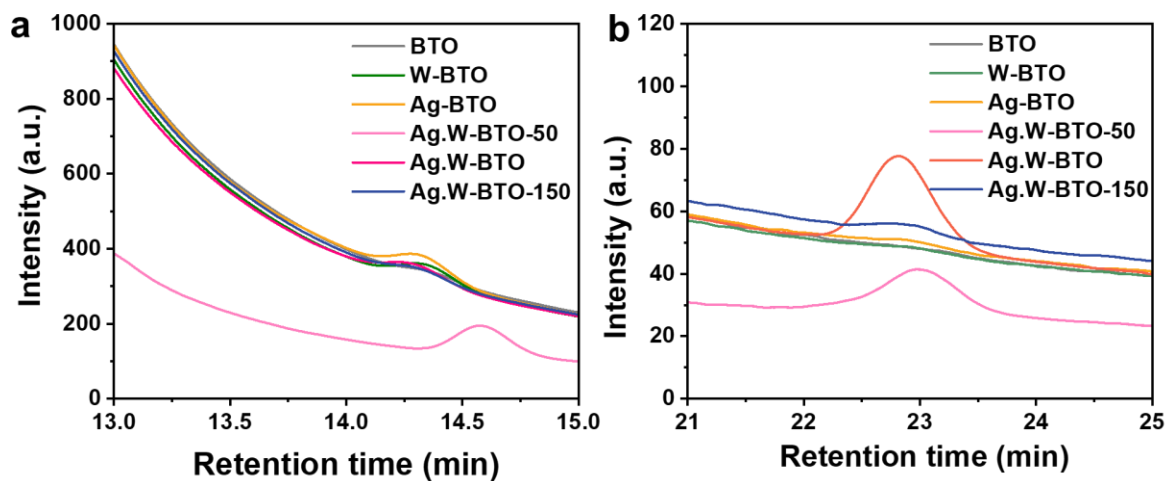

222

223 **Supplementary Figure 24. Results of GC spectra.** **a** GC spectrum (CH<sub>2</sub>O) of all prepared  
 224 samples from 13 to 15 min of retention time. **b** GC spectra (DMM) of all prepared samples  
 225 from 21 to 25 min of retention time.

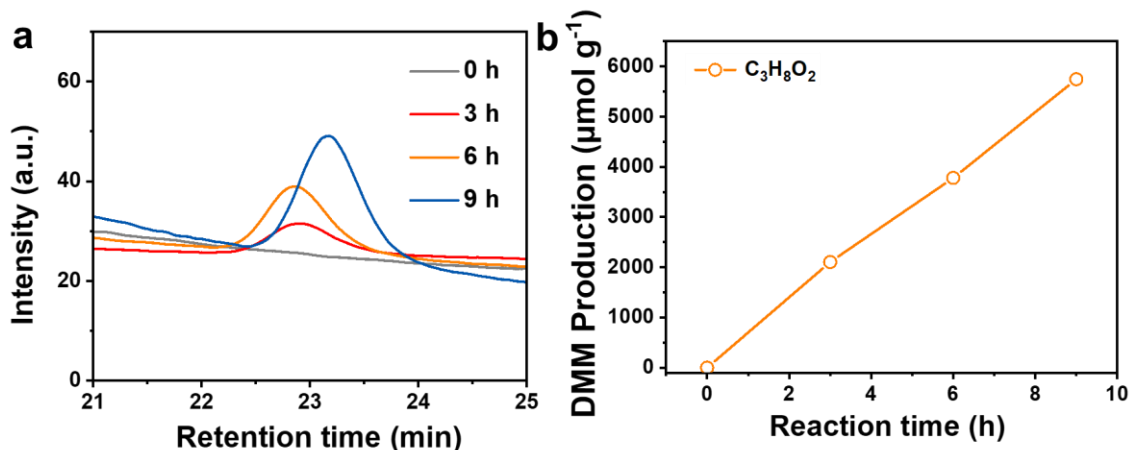

226

227 **Supplementary Figure 25. Results of GC spectra. a** GC spectra (DMM) on Ag.W-BTO from  
 228 21 to 25 min of retention time. **b** the in-operando performance of DMM in 9 h.

229

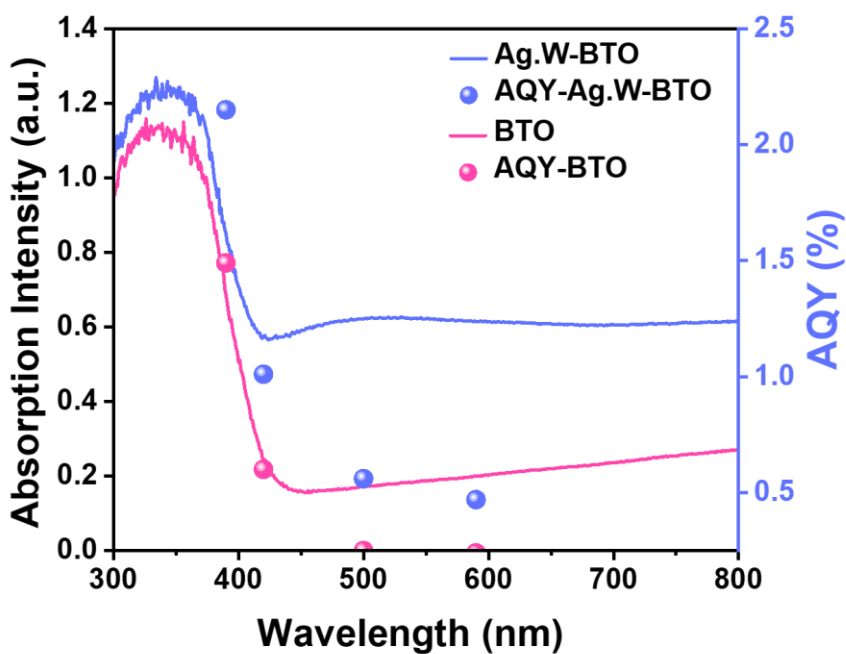

230

231 **Supplementary Figure 26. UV-vis absorption spectrum and wavelength-dependent AQY of**  
 232 BTO and Ag.W-BTO.

233



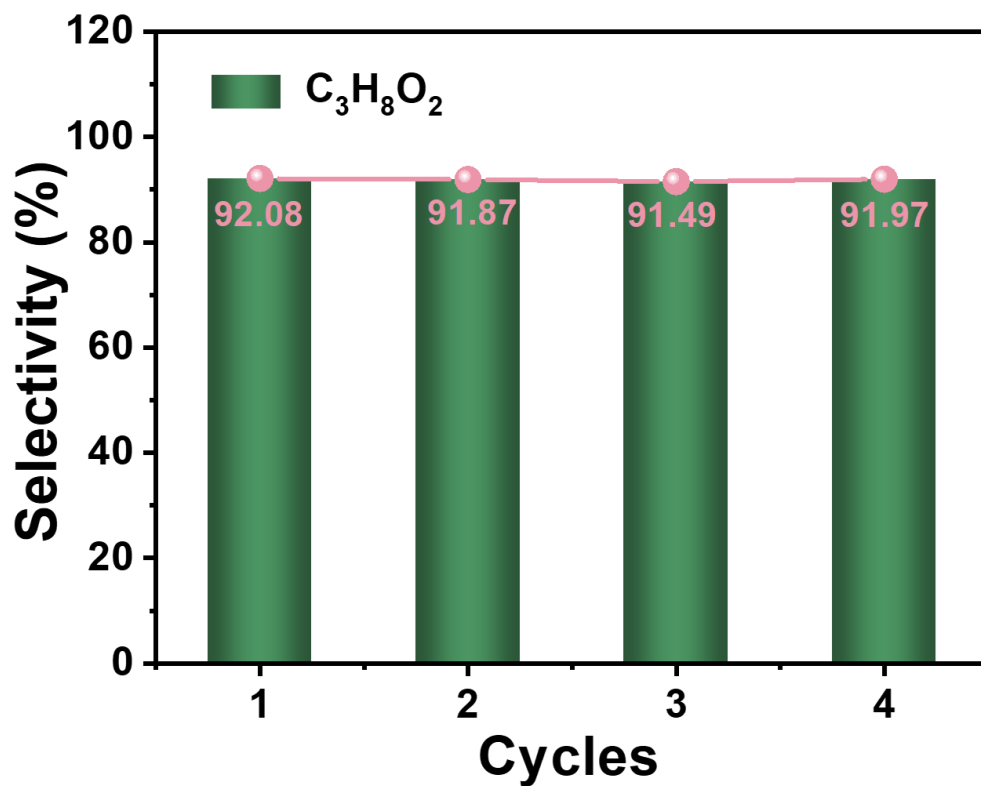

234

235 **Supplementary Figure 27.** The cycling measurements of DMM stability on Ag.W-BTO.

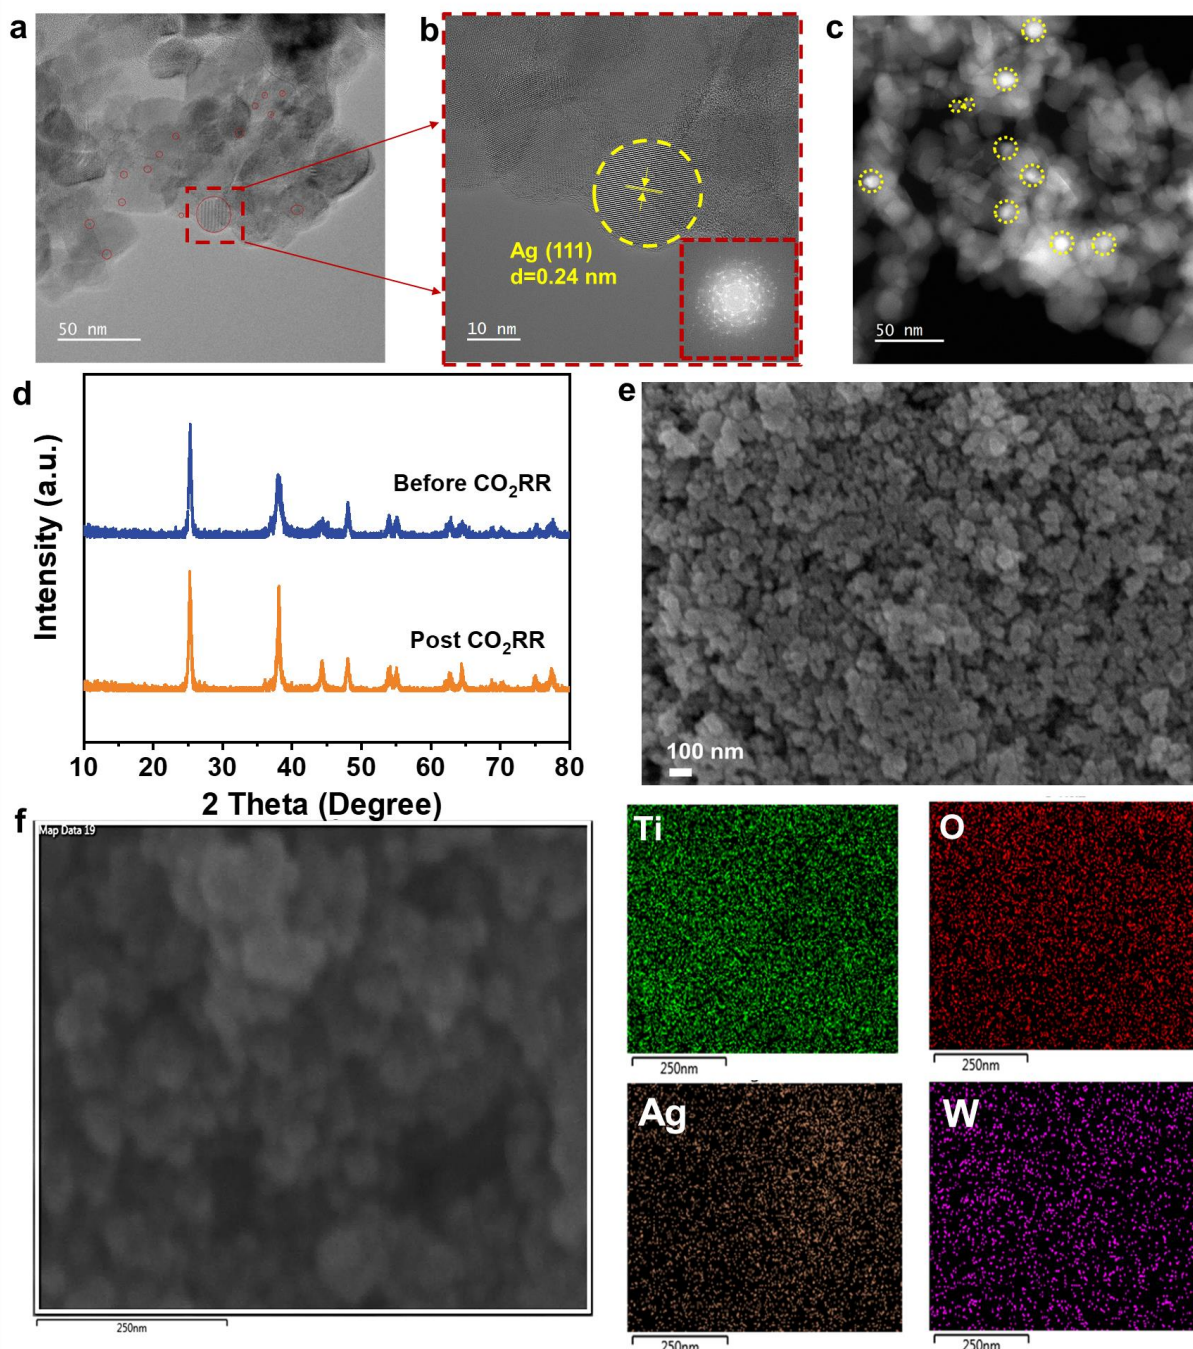

236

237 **Supplementary Figure 28. Morphology and structural characterizations of Ag.W-BTO**  
 238 **after photocatalytic stability test. a-c** TEM, HR-TEM with FFT pattern and STEM images of  
 239 Ag.W-BTO after stability test. **d** XRD patterns of before and post CO<sub>2</sub>RR reaction on Ag.W-  
 240 BTO. **e,f** SEM and SEM-EDS mapping Ti, O, Ag, W of Ag.W-BTO.

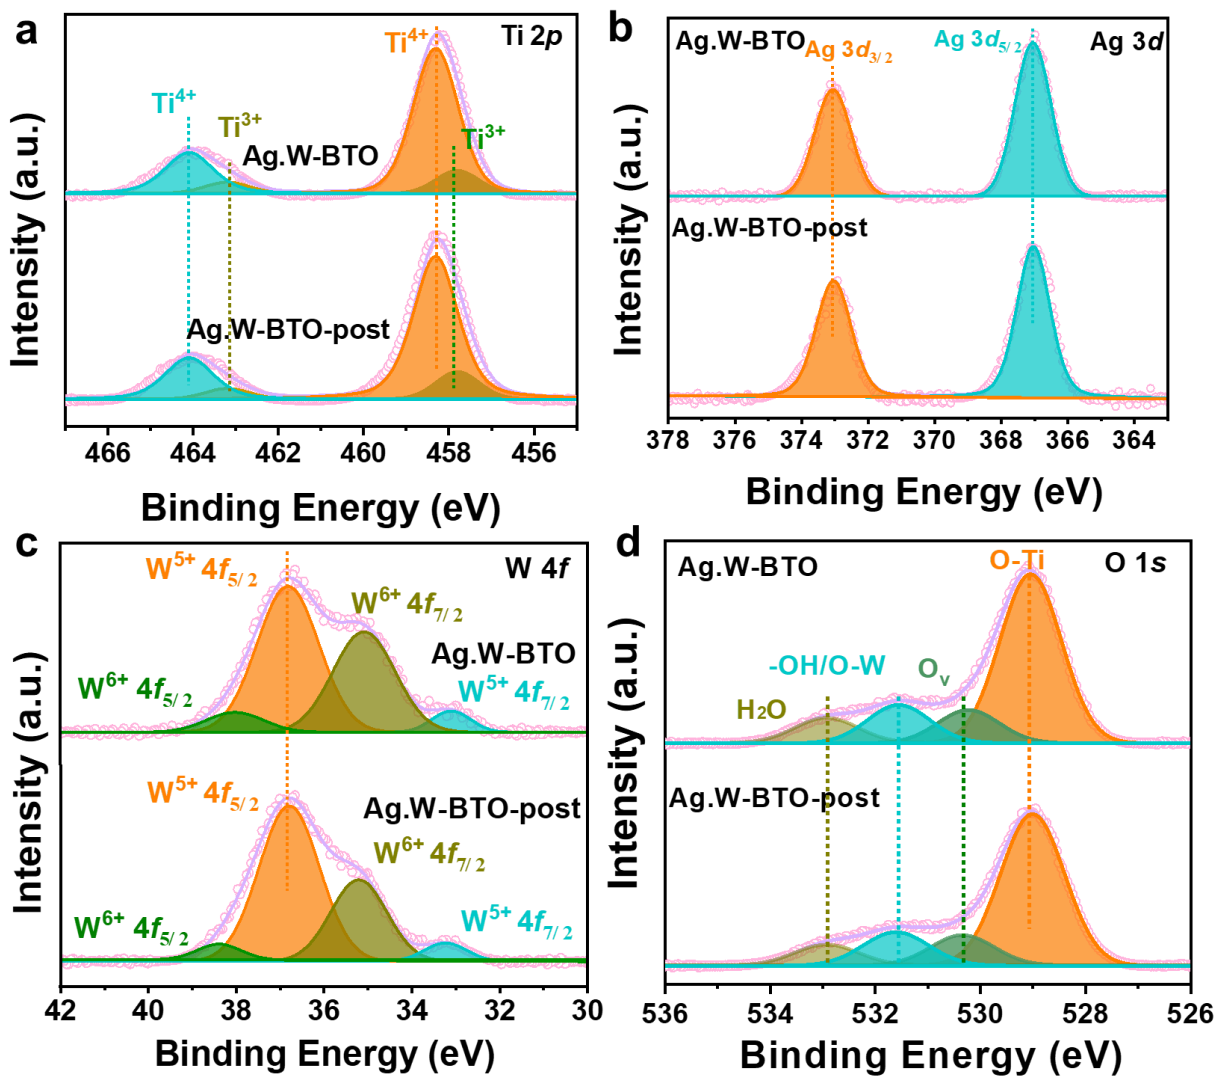

241  
 242 **Supplementary Figure 29. XPS of Ag.W-BTO before and after the stability. a Ti 2p, b Ag**  
 243 **3d, c W 4f, and d O 1s.**

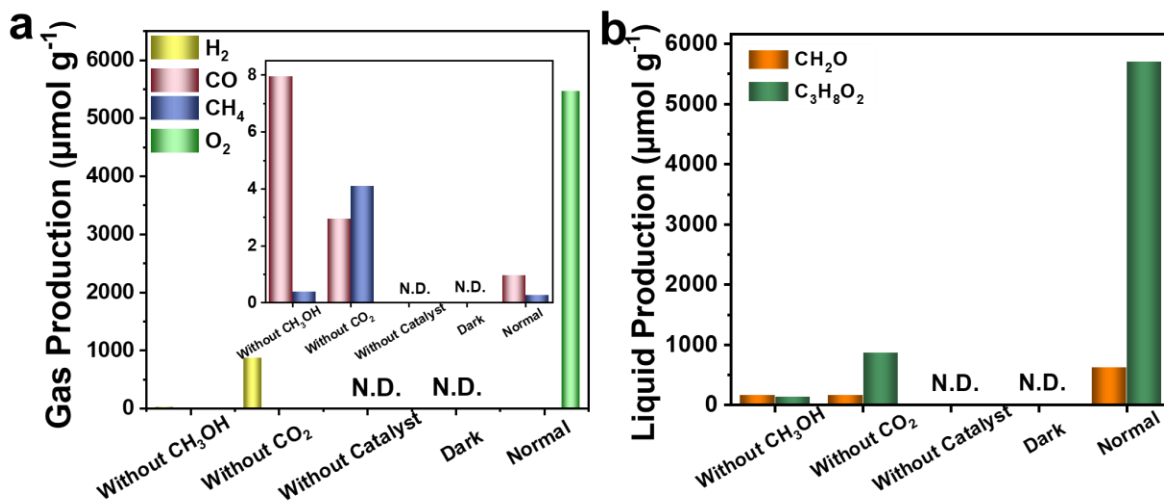

244  
 245 **Supplementary Figure 30. Control experiments of CO<sub>2</sub>RR in 9h on Ag.W-BTO catalyst**  
 246 **under different reaction conditions. a gas production rate, b liquid production rate. (N.D.**  
 247 **means no detection).**

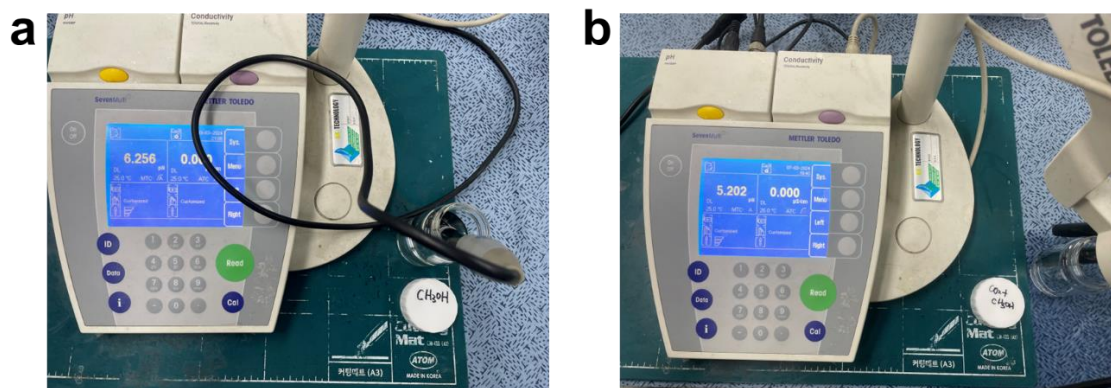

248  
 249 **Supplementary Figure 31. The pH values comparison of CH<sub>3</sub>OH by a pH meter. a before**  
 250 **and b after flowing CO<sub>2</sub> gas.**

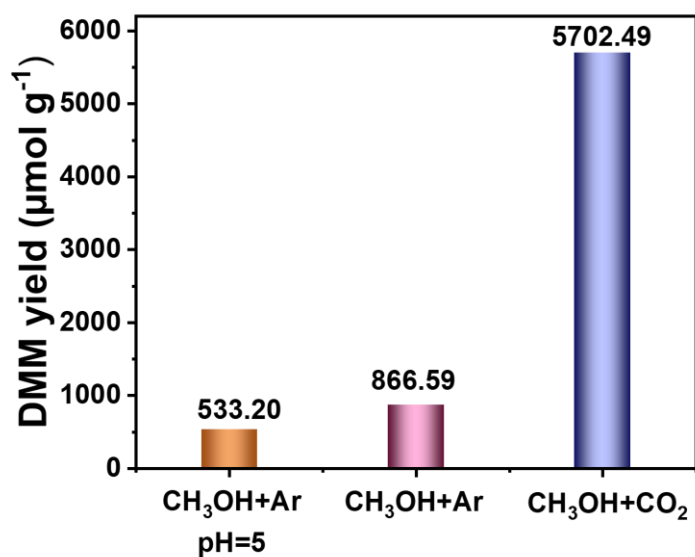

251

252 **Supplementary Figure 32.** The result of pH impact on DMM yield.

253

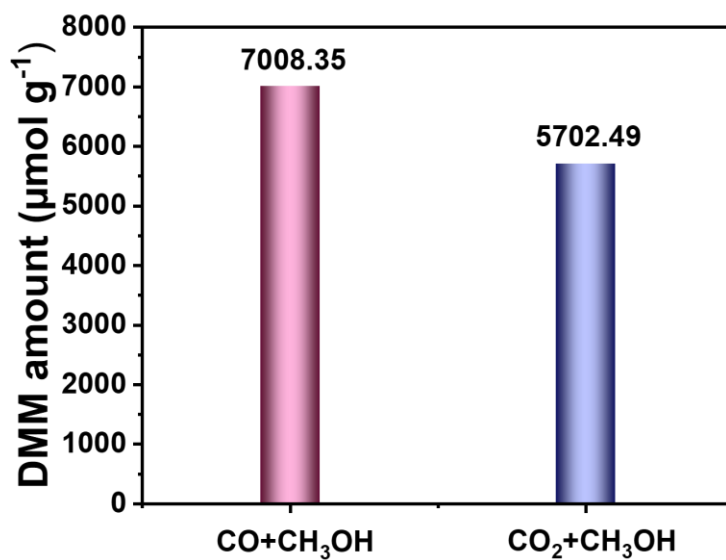

254

255 **Supplementary Figure 33.** The comparison of DMM production amount of  $\text{CO} + \text{CH}_3\text{OH}$  and  
 256  $\text{CO}_2 + \text{CH}_3\text{OH}$ .

257

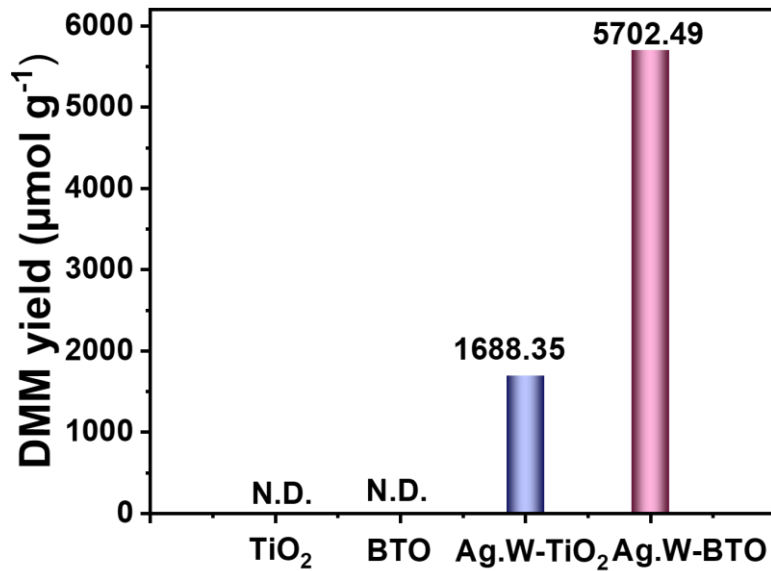

258

259 **Supplementary Figure 34.** The comparison of DMM production amount on TiO<sub>2</sub>, BTO, Ag.W-  
 260 TiO<sub>2</sub> and Ag.W-BTO, respectively.

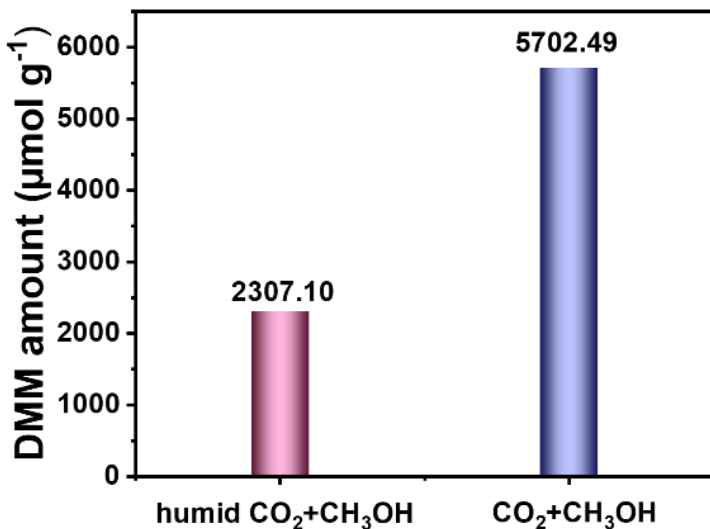

261

262 **Supplementary Figure 35.** The comparison of DMM production amount of humid CO<sub>2</sub> +  
 263 CH<sub>3</sub>OH and CO<sub>2</sub> + CH<sub>3</sub>OH.

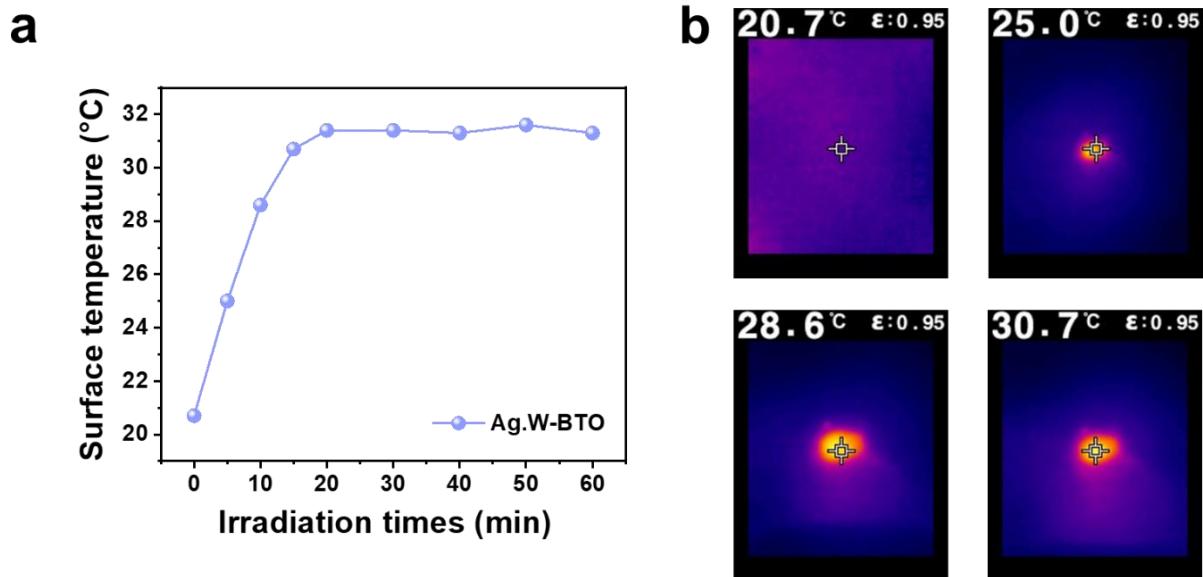

264  
 265 **Supplementary Figure 36. Localized surface plasmon resonance (LSPR) effect of Ag.W-**  
 266 **BTO. a** Temperature vs time curves of Ag.W-BTO within 60 min. **b** Representative infrared  
 267 thermal image.

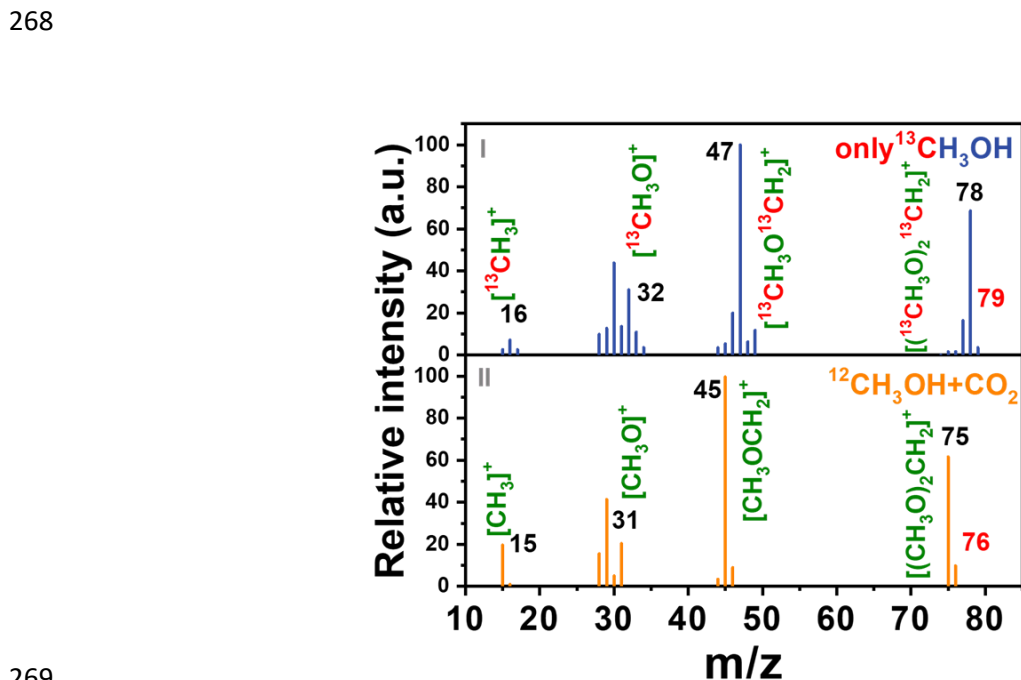

269  
 270 **Supplementary Figure 37. GC-MS result of I) only isotope labeled  $^{13}\text{CH}_3\text{OH}$  and II) isotope**  
 271 **non-labeled  $^{12}\text{CH}_3\text{OH} + \text{CO}_2$ .**

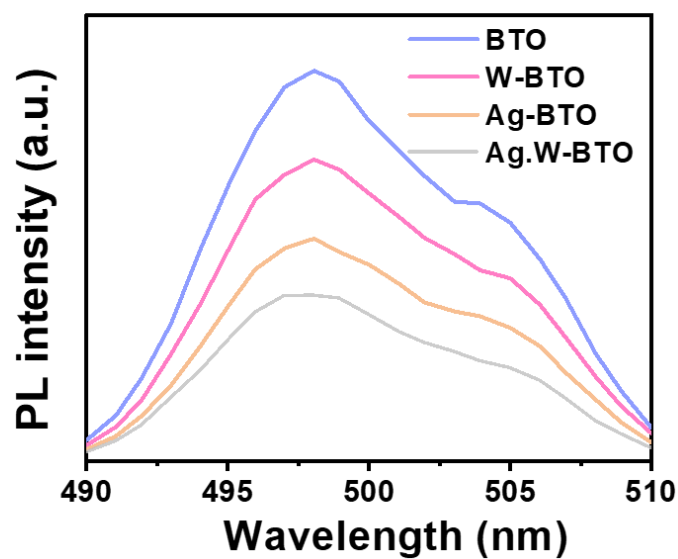

272

273 **Supplementary Figure 38.** PL of BTO, W-BTO, Ag-BTO, and Ag.W-BTO.

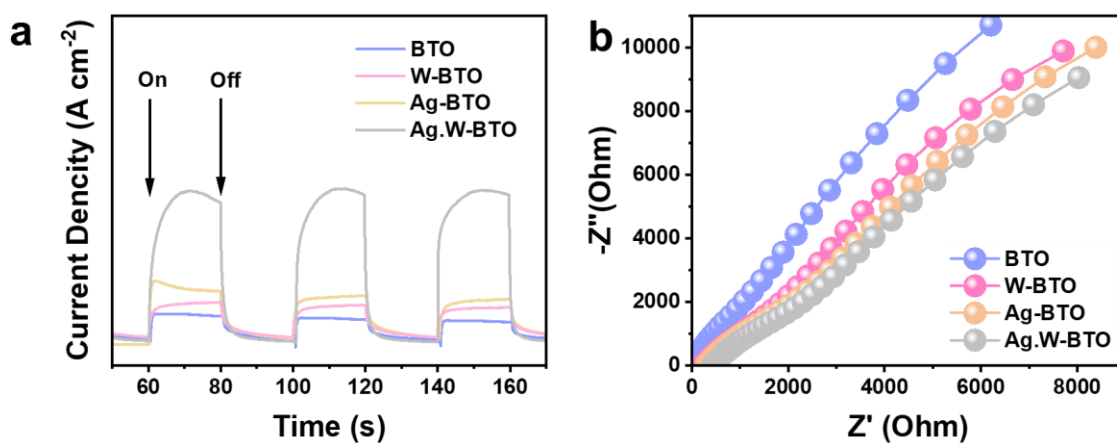

274

275 **Supplementary Figure 39. Photoelectrochemical characterization.** a Photo-current and b  
 276 Electrochemical impedance spectroscopy (EIS) of BTO, W-BTO, Ag-BTO, and Ag.W-BTO.



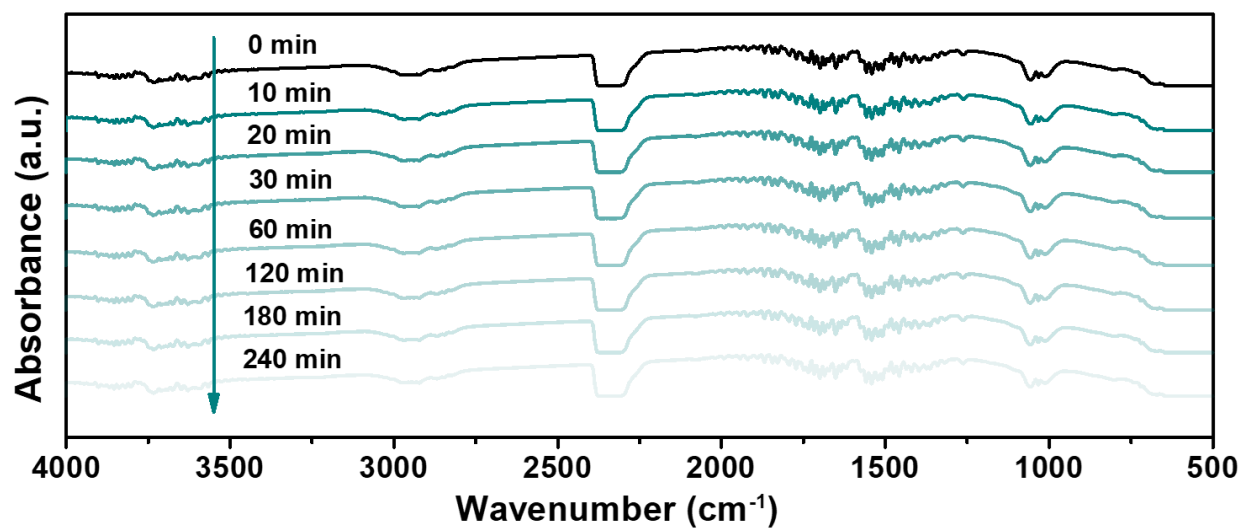

277

278 **Supplementary Figure 40.** In-situ DRIFTS spectra of KBr background.

279

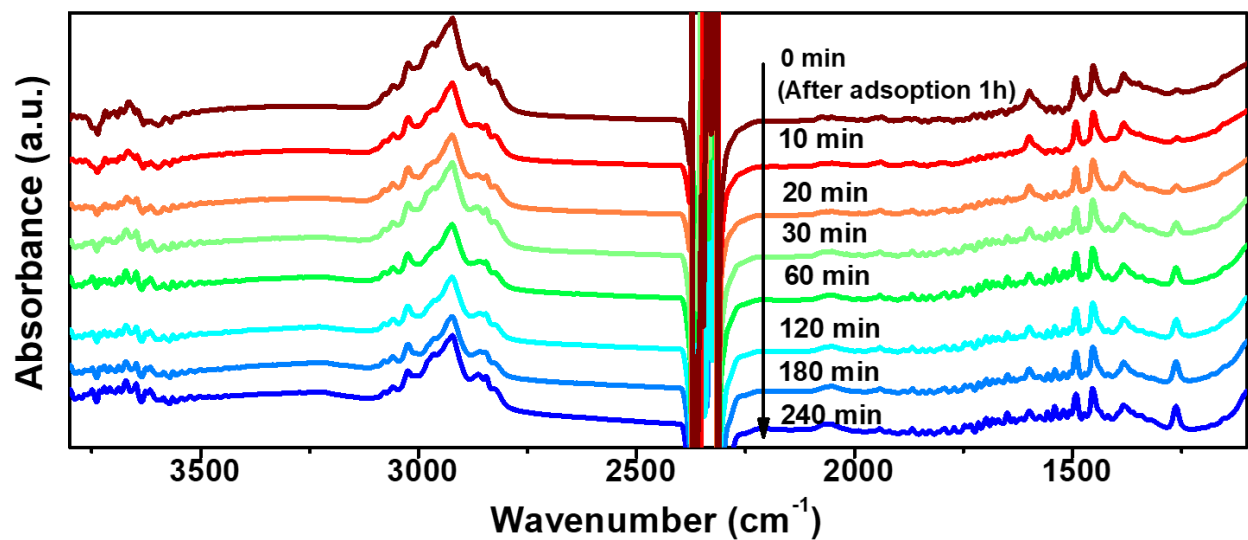

280

281 **Supplementary Figure 41.** In-situ DRIFTS spectra of  $\text{CO}_2$ RR with MOR on Ag.W-BTO.

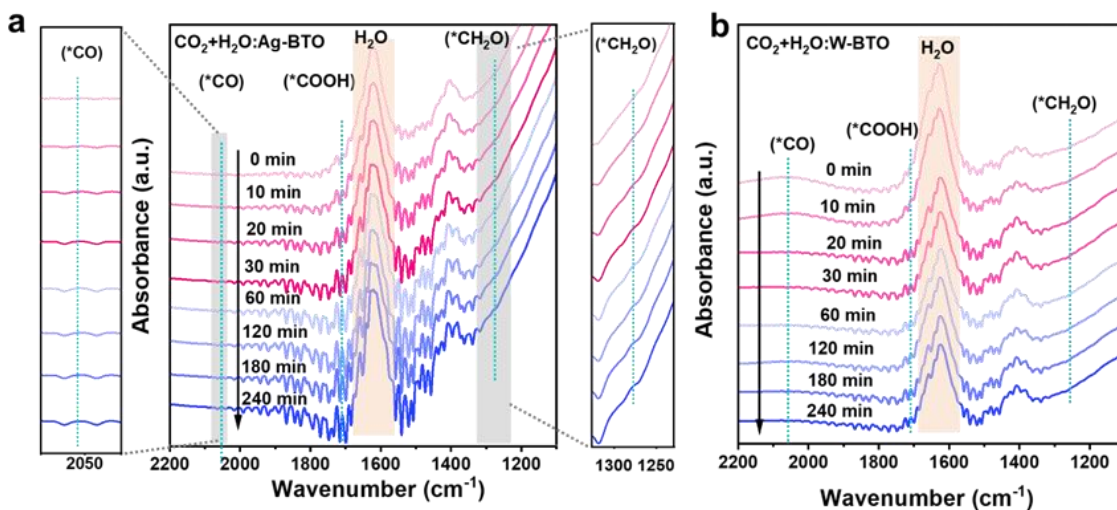

282  
 283 **Supplementary Figure 42. The comparison of in-situ DRIFTS spectra by flowing CO<sub>2</sub> +**  
 284 **H<sub>2</sub>O. a** Ag-BTO with enlarged view of shaded area. **b** W-BTO under UV-visible light  
 285 irradiation in different reaction times.

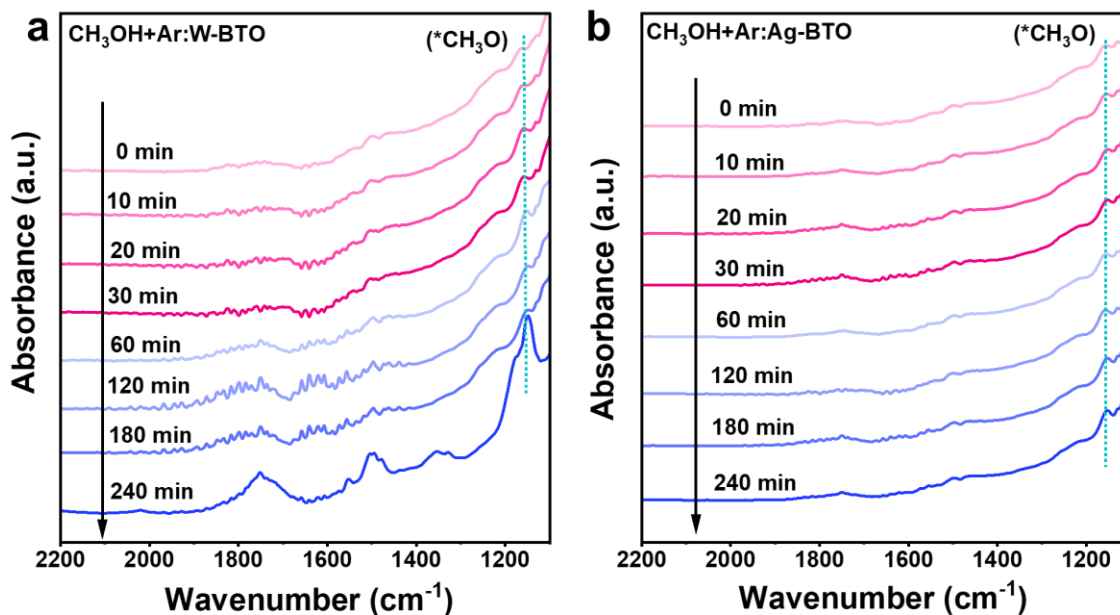

286  
 287 **Supplementary Figure 43. The comparison of in-situ DRIFTS spectra by flowing CH<sub>3</sub>OH +**  
 288 **Ar. a** W-BTO and **b** Ag-BTO under UV-visible light irradiation in different reaction times.

289

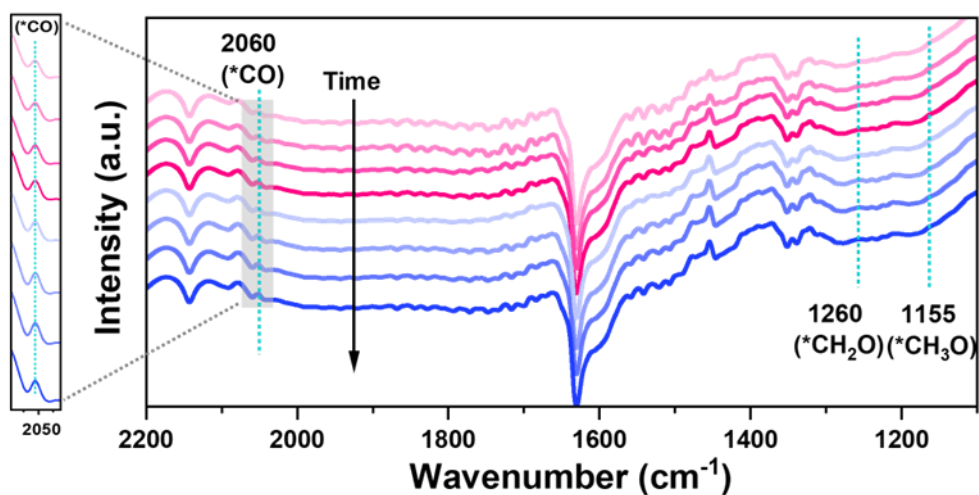

290

291 **Supplementary Figure 44.** In-situ DRIFTS spectra on the Ag.W-BTO by flowing CO and  
 292 CH<sub>3</sub>OH gas under UV-visible irradiation at detailed reaction times (0, 10, 20, 30, 60, 120, 180,  
 293 240 min) after adoption 1 hour in the dark.

294

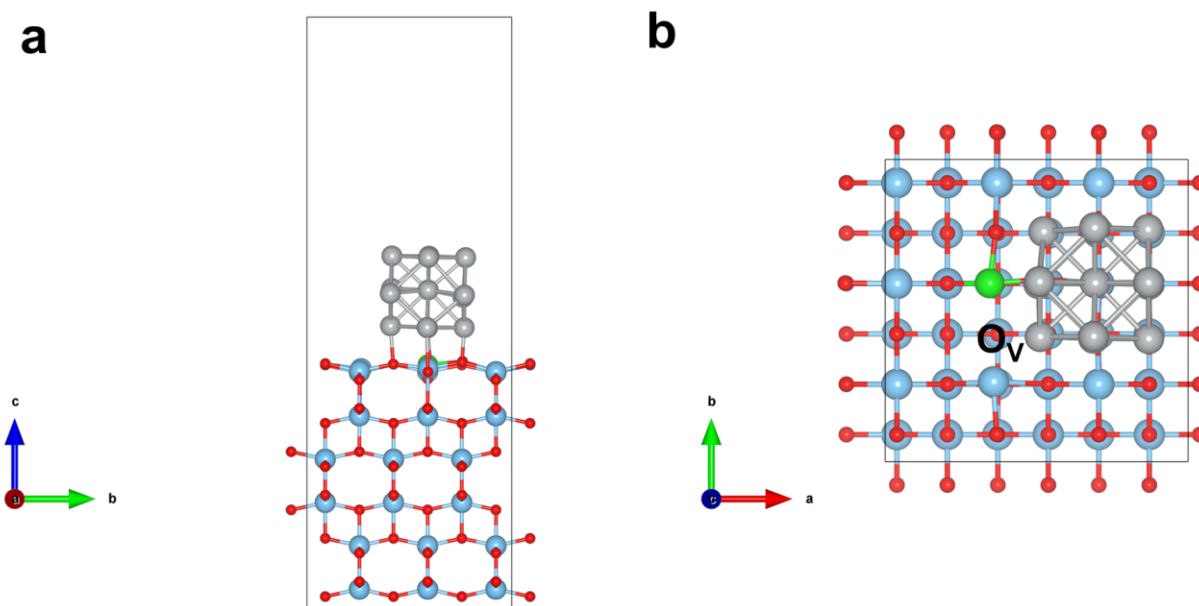

295

296 **Supplementary Figure 45.** The optimized Ag.W-BTO structure. **a** side view and **b** top view.

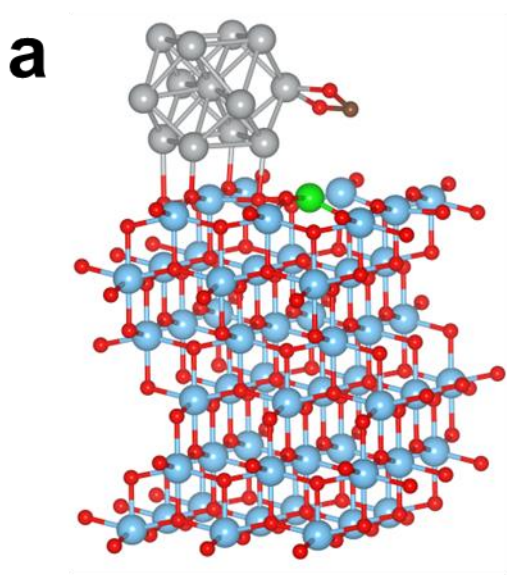

$E_{\text{ads}} = -2.413 \text{ eV}$

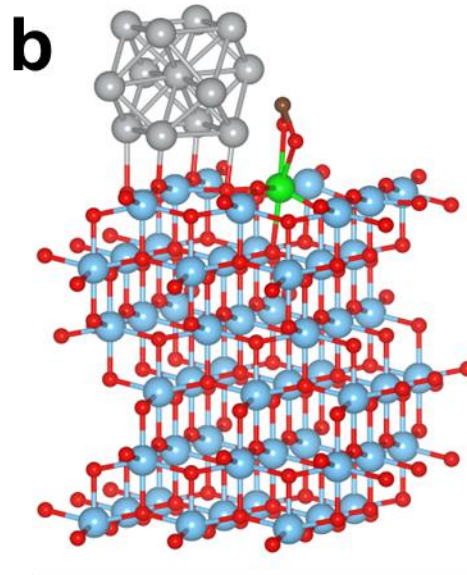

$E_{\text{ads}} = -2.014 \text{ eV}$

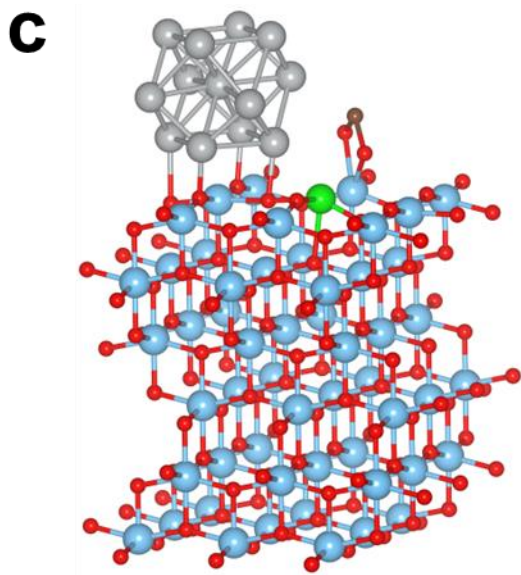

$E_{\text{ads}} = -1.498 \text{ eV}$

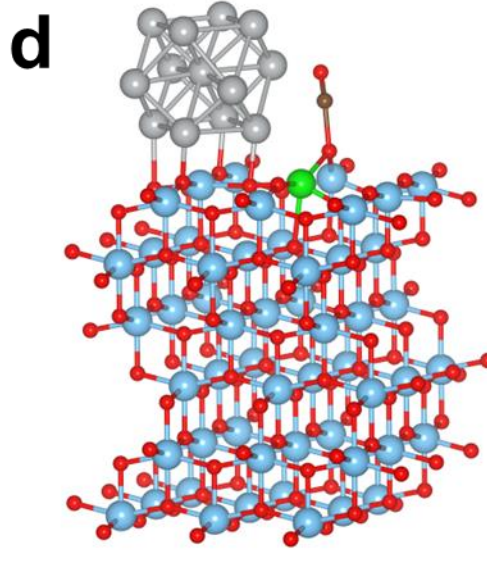

$E_{\text{ads}} = -1.159 \text{ eV}$

297

298 **Supplementary Figure 46. Optimized DFT structures for CO<sub>2</sub> adsorption. a Ag, b W, c Ti,**  
 299 **and d O<sub>v</sub> active sites of Ag.W-BTO, respectively.**

300

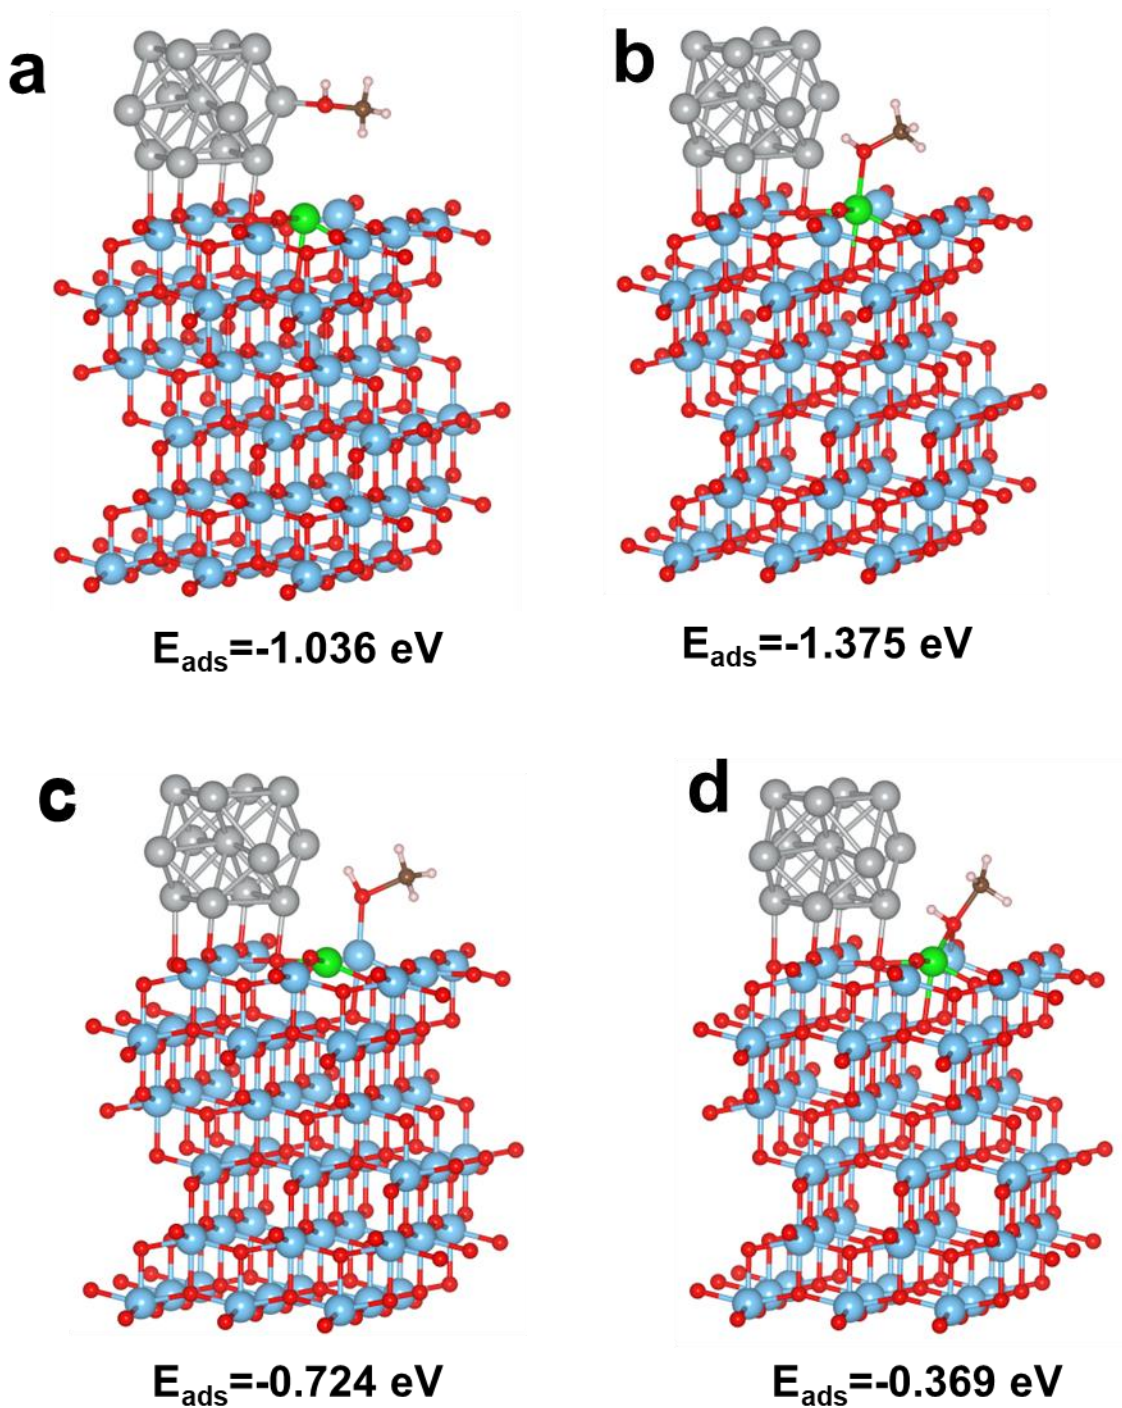

303 **Supplementary Figure 47. Optimized DFT structures for CH<sub>3</sub>OH adsorption. a Ag, b W, c**  
304 **Ti, and d O<sub>v</sub> active sites of Ag.W-BTO, respectively.**

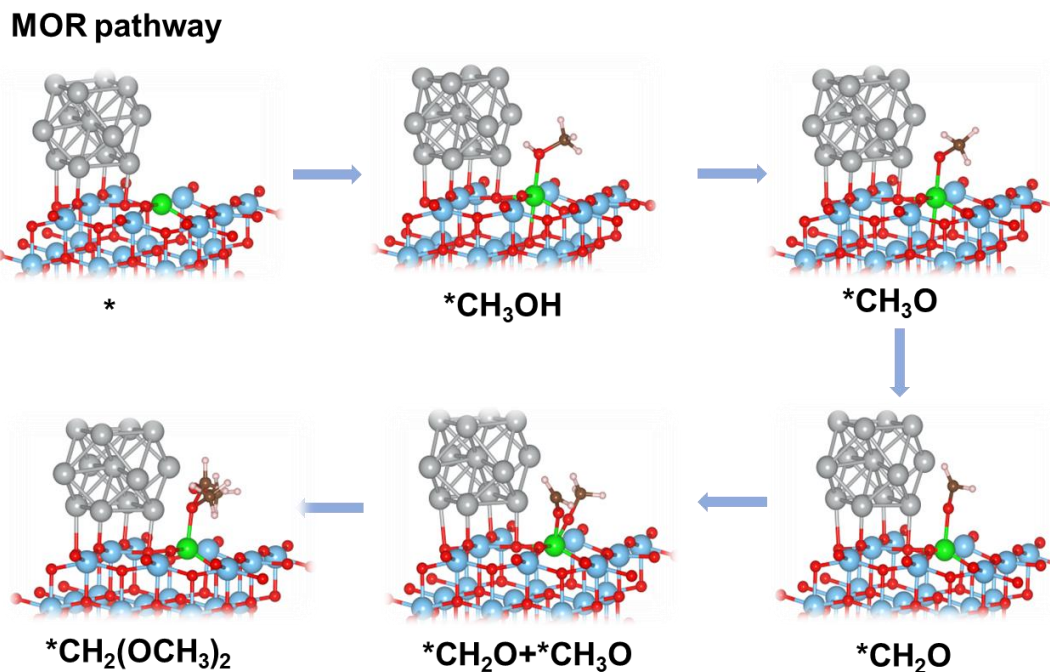

305

306 **Supplementary Figure 48.** Geometries of selected reaction intermediates involved in MOR  
 307 pathways in the generation of DMM product.

308

309 **Supplementary Table 1.** The chemical contents of different catalysts are determined by XPS.

| <b>Samples</b> | <b>Ti (wt.%)</b> | <b>O (wt.%)</b> | <b>W (wt.%)</b> | <b>Ag (wt.%)</b> |
|----------------|------------------|-----------------|-----------------|------------------|
| BTO            | 35.642           | 64.359          | 0               | 0                |
| W-BTO          | 34.841           | 64.472          | 0.689           | 0                |
| Ag-BTO         | 32.293           | 65.655          | 0               | 2.052            |
| Ag.W-BTO-50    | 29.395           | 65.102          | 2.335           | 3.168            |
| Ag.W-BTO       | 30.361           | 64.578          | 1.521           | 3.542            |
| Ag.W-BTO-150   | 28.967           | 62.753          | 2.205           | 6.085            |

310

311 **Supplementary Table 2.** Weight% of W and Ag loading obtained by ICP-OES analysis.

| <b>Samples</b> | <b>W (wt.%)</b> | <b>Ag (wt.%)</b> |
|----------------|-----------------|------------------|
| BTO            | -               | -                |
| W-BTO          | 19.12           | -                |
| Ag-BTO         | -               | 26.74            |
| Ag.W-BTO-50    | 19.08           | 18.07            |
| Ag.W-BTO       | 19.23           | 28.11            |
| Ag.W-BTO-150   | 18.91           | 38.53            |

312

313

314 **Supplementary Table 3.** EXAFS fitting parameters at the Ti K-edge for Anatase TiO<sub>2</sub>, BTO,  
 315 Ag-BTO, W-BTO, and Ag.W-BTO

| <b>Sample</b>                  | <b>Bond</b> | <b>CN = <math>N \times S_0^2</math></b> | <b>R (Å)</b> | <b><math>\sigma^2</math> (Å<sup>-2</sup>)</b> | <b><math>\Delta E_0</math> (eV)</b> | <b>R-factor</b> |
|--------------------------------|-------------|-----------------------------------------|--------------|-----------------------------------------------|-------------------------------------|-----------------|
| <b>Anatase TiO<sub>2</sub></b> | Ti–O        | 6                                       | 1.956        | 0.0091                                        | –1.98                               | 0.0511          |
|                                | Ti–Ti (1)   | 4                                       | 3.05         | 0.0089                                        | –9.57                               |                 |
|                                | Ti–Ti (2)   | 4                                       | 3.842        | 0.0077                                        | –16.15                              |                 |
| <b>BTO</b>                     | Ti–O        | 2.4                                     | 1.91         | 0.0025                                        | –9.55                               | 0.0576          |
| <b>Ag-BTO</b>                  | Ti–O        | 5.4                                     | 1.933        | 0.0083                                        | –4.58                               | 0.0246          |
|                                | Ti–Ti (1)   | 1.92                                    | 3.01         | 0.0036                                        | –11.53                              |                 |
|                                | Ti–Ti (2)   | 4                                       | 3.565        | 0.0156                                        | 4.8                                 |                 |
| <b>W-BTO</b>                   | Ti–O        | 5.22                                    | 1.928        | 0.0081                                        | –5.1                                | 0.0186          |
|                                | Ti–Ti (1)   | 1.8                                     | 3.003        | 0.0029                                        | –12.2                               |                 |
|                                | Ti – Ti (2) | 4                                       | 3.567        | 0.0155                                        | 4.85                                |                 |
| <b>Ag.W-BTO</b>                | Ti–O        | 5.57                                    | 1.954        | 0.0088                                        | –3.6                                | 0.0178          |
|                                | Ti–Ti (1)   | 2.2                                     | 3.012        | 0.0040                                        | –13                                 |                 |
|                                | Ti–Ti (2)   | 4                                       | 3.597        | 0.0143                                        | 5.27                                |                 |

316 CN: coordination numbers; R: bond distance;  $\sigma^2$ : Debye-Waller factors;  $\Delta E^0$ : the inner potential  
 317 correction; R-factor: goodness of fit.

318



319 **Supplementary Table 4.** EXAFS fitting parameters at the Ag K-edge for Ag foil, Ag<sub>2</sub>O, Ag-  
 320 BTO, and Ag.W-BTO

| Sample            | Bond  | CN = $N \times S_0^2$ | R (Å) | $\sigma^2$ (Å <sup>-2</sup> ) | $\Delta E_0$ (eV) | R-factor |
|-------------------|-------|-----------------------|-------|-------------------------------|-------------------|----------|
| Ag foil           | Ag–Ag | 12                    | 2.863 | 0.0081                        | –1                | 0.0007   |
| Ag <sub>2</sub> O | Ag–O  | 2                     | 2.062 | 0.0057                        | 2.12              | 0.0495   |
|                   | Ag–Ag | 12                    | 3.151 | 0.0416                        | –8.08             |          |
| Ag-BTO            | Ag–Ag | 10.46                 | 2.860 | 0.0081                        | 0.63              | 0.0010   |
| Ag.W-BTO          | Ag–Ag | 8.41                  | 2.857 | 0.0080                        | –1.48             | 0.0022   |

321 CN: coordination numbers; R: bond distance;  $\sigma^2$ : Debye-Waller factors;  $\Delta E_0$ : the inner potential  
 322 correction; R-factor: goodness of fit.

323

324 **Supplementary Table 5.** EXAFS fitting parameters at the W L<sub>3</sub>-edge for W foil, WO<sub>3</sub>, W-BTO,  
 325 and Ag.W-BTO

| Sample          | Bond    | CN = $N \times S_0^2$ | R (Å) | $\sigma^2$ (Å <sup>-2</sup> ) | $\Delta E_0$ (eV) | R-factor |
|-----------------|---------|-----------------------|-------|-------------------------------|-------------------|----------|
| W foil          | W–W (1) | 8                     | 2.756 | 0.004                         | 7.93              | 0.0199   |
|                 | W–W (2) | 6                     | 3.177 | 0.007                         | 9.84              |          |
| WO <sub>3</sub> | W–O (1) | 4                     | 1.781 | 0.0072                        | 1.1               | 0.0118   |
|                 | W–O (2) | 2                     | 2.097 | 0.0048                        | 3.04              |          |
| W-BTO           | W–O (1) | 3.06                  | 1.887 | 0.0034                        | 14.9              | 0.0391   |
|                 | W–O (2) | 2.77                  | 2.245 | 0.0054                        | 15.69             |          |
| Ag.W-BTO        | W–O (1) | 3.88                  | 1.77  | 0.009                         | –8.48             | 0.047    |
|                 | W–O (2) | 1                     | 2.098 | 0.0005                        | –1.47             |          |

326 CN: coordination numbers; R: bond distance;  $\sigma^2$ : Debye-Waller factors;  $\Delta E_0$ : the inner potential  
 327 correction; R-factor: goodness of fit.

328 **Supplementary Table 6.** The BET, pore size, and pore volume of BTO, W-BTO, Ag-BTO, and  
 329 Ag.W-BTO.

| Samples  | BET (m <sup>2</sup> g <sup>-1</sup> ) | Pore diameter (nm) | Pore volume (cm <sup>3</sup> g <sup>-1</sup> ) |
|----------|---------------------------------------|--------------------|------------------------------------------------|
| BTO      | 28.62                                 | 29.80              | 0.25                                           |
| W-BTO    | 44.68                                 | 40.66              | 0.36                                           |
| Ag-BTO   | 35.26                                 | 40.80              | 0.32                                           |
| Ag.W-BTO | 52.12                                 | 32.78              | 0.40                                           |

330  
 331 **Supplementary Table 7.** Decay lifetimes of fs-TA spectra and their relative percentages of  
 332 photoexcited charge carriers in the BTO, Ag-BTO, W-BTO, and Ag.W-BTO.

| Decay lifetimes | BTO        | Ag-BTO     | W-BTO      | Ag.W-BTO     |
|-----------------|------------|------------|------------|--------------|
| $\tau_1$ (ps)   | 0.10 (55%) | 0.10 (56%) | 0.10 (89%) | 0.10 (19%)   |
| $\tau_2$ (ps)   | 1.40 (45%) | 2.88 (44%) | 0.20 (11%) | 6.71 (60%)   |
| $\tau_3$ (ps)   | -          | -          | -          | 172.05 (22%) |

333  
 334 **Supplementary References**

335 1. Gondal M, et al. Preparation of WO<sub>3</sub>/g-C<sub>3</sub>N<sub>4</sub> composites and their enhanced  
 336 photodegradation of contaminants in aqueous solution under visible light irradiation.  
 337 *Reaction Kinetics, Mechanisms and Catalysis* **114**, 357-367 (2015).

338 2. Kresse G, Furthmüller J. Efficiency of ab initio total energy calculations for metals and  
 339 semiconductors using a plane-wave basis set. *Comput Mater Sci* **6**, 15-50 (1996).

340 3. Kresse G, Furthmüller J. Efficient iterative schemes for ab initio total-energy calculations  
 341 using a plane-wave basis set. *Phys Rev B* **54**, 11169 (1996).

342 4. Perdew JP, Burke K, Ernzerhof M. Generalized gradient approximation made simple.  
 343 *Phys Rev Lett* **77**, 3865-3868 (1996).

344 5. Kresse G, Joubert D. From ultrasoft pseudopotentials to the projector augmented-wave  
 345 method. *Phys Rev B* **59**, 1758 (1999).

346 6. Blöchl PE. Projector augmented-wave method. *Phys Rev B* **50**, 17953 (1994).  
347
